# Supplementary material for: Genome-wide identification, splicing, and expression analysis of the myosin gene family in maize (Zea mays)
Source: PubMed Central journal article supplement (PMC3935558; doi:10.1093/jxb/ert437), 2013-12-21
Supplement: supp_ert437_jexbot107649_file001.pdf [file supp_ert437_jexbot107649_file001.pdf]

# **Genome-wide identification, splicing and expression analysis of the myosin gene family in maize (*Zea mays*.)**

Guifeng Wang\*, Mingyu Zhong\*, Jijia Wang, Jushan Zhang, Yuanping Tang, Gang Wang<sup>§</sup>,  
Rentao Song<sup>§</sup>

Shanghai Key Laboratory of Bio-Energy Crops, School of Life Sciences, Shanghai University,  
No. 333 Nanchen Road, Shanghai, P.R. China

\*These authors contributed equally to this work.

## **§Corresponding author**

E-mail: [wg@shu.edu.cn](mailto:wg@shu.edu.cn)

E-mail: [rentaosong@staff.shu.edu.cn](mailto:rentaosong@staff.shu.edu.cn)

Tel: +86-21-66135186; fax: +86-21-66135186.

## Supplementary Tables

**Supplementary Table S1.** A list of primers used in this study.

| <b>Usage</b>                                     | <b>Primer Name</b> | <b>Sequence (5'-----3')</b> |
|--------------------------------------------------|--------------------|-----------------------------|
| <b>Semi-quantitative RT PCR</b>                  | ZmVIII-1-F         | GACGGATGAGGGAGACGAA         |
|                                                  | ZmVIII-1-R         | CAGGCAGAAAGTAAAGCACAA       |
|                                                  | ZmVIII-2-F         | CAGCCTAAACCCAGACATG         |
|                                                  | ZmVIII-2-R         | CAATTCAGTAGTCCTTGACCC       |
|                                                  | ZmVIII-3-F         | CAACGACACTGGGTCAAGG         |
|                                                  | ZmVIII-3-R         | ATGCCTTGCACATTTCAACAA       |
|                                                  | ZmXI-1-F           | TGAGAAAGACAGGGAGGCA         |
|                                                  | ZmXI-1-R           | ACGCCAGAACTCCACATAACT       |
|                                                  | ZmXI-2-F           | TTTGTGAGGAGGCAGGACAC        |
|                                                  | ZmXI-2-R           | ATGGATGACTGGTTGAGGC         |
|                                                  | ZmXI-3-F           | CGGTCAGCAGTTCGTTCC          |
|                                                  | ZmXI-3-R           | ACGACTCGGTAGATGTGG          |
|                                                  | ZmXI-4-F           | CAGAACGACGAGACGGGGTAG       |
|                                                  | ZmXI-4-R           | TGGACAAATTGCAGGAGAAAC       |
|                                                  | ZmXI-5-F           | CGGACATCATCAGGCTTAG         |
|                                                  | ZmXI-5-R           | TCCCGACGAAGCAGTAAG          |
|                                                  | ZmXI-6-F           | AACCGAGGAAATTGCAGAG         |
|                                                  | ZmXI-6-R           | TGACAGCGACCTACAAAGA         |
|                                                  | ZmXI-7-F           | ATGCGGGTGCTAATGACA          |
|                                                  | ZmXI-7-R           | AACTGTAAGGGCGGAATC          |
|                                                  | ZmXI-8-F           | CTCCTCTGAGGCGTGAAT          |
|                                                  | ZmXI-8-R           | ATGTTTGGCATTGACTTCG         |
|                                                  | ZmXI-9-F           | TGACCAAGGAATCAAGCG          |
|                                                  | ZmXI-9-R           | TCTAATGCCAACCGAGCC          |
|                                                  | ZmXI-10-F          | AGGATTATTTCCACCAGCAA        |
|                                                  | ZmXI-10-R          | CTACCACCAATTAGGAAATCTA      |
|                                                  | ZmXI-11-F          | AAGTCACGACCTTTGTCCG         |
|                                                  | ZmXI-11-R          | GATTGTCGCCCAATAACCA         |
|                                                  | ZmUBQ-Q-F          | CTGGTGCCCTCTCCATATGG        |
|                                                  | ZmUBQ-Q-R          | CAAACTGACACGACTCATGACA      |
| <b>Putative full length myosins gap covering</b> | ZmXI-2-Gap-F       | ATGGGACTACAGGGTTATCAGGG     |
|                                                  | ZmXI-2-Gap-R       | GCCTCTTTGGCAGTGACATCTT      |
|                                                  | ZmXI-6-Gap-F       | TCAAAGACGGATTTCCACCTG       |

|                                                                                |                     |                                                   |
|--------------------------------------------------------------------------------|---------------------|---------------------------------------------------|
|                                                                                | ZmXI-6-Gap-R        | AAGGTTCCGCAATGCCCTTT                              |
|                                                                                | ZmXI-7-Gap-F        | ACGGAAAGCACCAAGATG                                |
|                                                                                | ZmXI-7-Gap-R        | AGGCCTGAAACAAATGCA                                |
|                                                                                | ZmXI-8- Gap-F1      | GTGAAAGCGGTGCTGGTAAA                              |
|                                                                                | ZmXI-8- Gap-R1      | GCATTGTTTCCACTTGCATA                              |
|                                                                                | ZmXI-8- Gap-F2      | GCCACTCTTCGTGAGATGGA                              |
|                                                                                | ZmXI-8- Gap-R2      | CAGTTGCCCTGGTGGCTTTA                              |
|                                                                                | ZmXI-9- Gap-F       | AATGGACATTGTGGGCATC                               |
|                                                                                | ZmXI-9- Gap-R       | CATTGCTATCGTGTTTCTGC                              |
|                                                                                | ZmXI-10- Gap-F      | TTGTATCAGGATTATTTCCACCAG                          |
|                                                                                | ZmXI-10- Gap-R      | GACTAGCCACTGCTGATCGTCT                            |
|                                                                                | HDO1-5RACE1         | TCATCACTACTTTTGCAGTCACA                           |
|                                                                                | HDO1-5RACE2         | GCATTTCCCCTCGACTTCCTTCA                           |
| <b>Vector construction for subcellular localization and GUS activity assay</b> | O1head domain-f     | GCGAATTCATGAGCTACCGGAAGGGGTTG                     |
|                                                                                | O1head domain-r     | CGGTCGACTCCTCCTCCTCCTCCTCCTCAGCACGGCGCATATCTAAAAT |
|                                                                                | O1 head domain IQ-f | GCGAATTCATGAGCTACCGGAAGGGGTTG                     |
|                                                                                | O1 head domain IQ-r | CGGTCGACTCCTCCTCCTCCTCCTCCTAGCTCCTTTCTTGCAAGCTT   |
|                                                                                | eYFP-F              | GCGAATTCGTCGACATGGTGAGCAAGGGCGAGGAG               |
|                                                                                | eYFP-R              | CGCTCGAGCTTGTACAGCTCGTCCATGCC                     |
|                                                                                | O1-P1-F             | CGTCTAGACGGGATAACCACCGTGTCAT                      |
|                                                                                | O1-P1-R             | ATCCCGGGCCTGCCGAAACCCTAAGCTC                      |
|                                                                                | O1-P2-F             | CGTCTAGACAGAGCAGGCCGCATTGATC                      |
|                                                                                | O1-P2-R             | ATCCCGGGGTATGGTCAGAAACCCAACGCA                    |
| <b>Alternatively spliced transcripts detection</b>                             | ZmXI-2-F1           | AGGGTTATTTCCACAAGCA                               |
|                                                                                | ZmXI-2-R1           | CTCGCCCTGATAACCCTGT                               |
|                                                                                | ZmXI-5-F            | CGGACATCATCAGGCTTAG                               |
|                                                                                | ZmXI-5-R            | TCCCGACGAAGCAGTAAG                                |
|                                                                                | ZmXI-7-F1           | ACGGAAAGCACCAAGATG                                |
|                                                                                | ZmXI-7-R1           | GAATAGCCGCAACAACCC                                |
|                                                                                | ZmXI-8-F            | CTCCTCTTGAGGCGTGAAT                               |
|                                                                                | ZmXI-8-R            | ATGTTTGGCATTGACTTCG                               |
|                                                                                | ZmXI-10-F           | AGGATTATTTCCACCAGCAA                              |
|                                                                                | ZmXI-10-R           | CTACCACCAATTAGGAAATCTA                            |
|                                                                                | ZmXI-11-F           | AAGTCACGACCTTTGTCCG                               |
|                                                                                | ZmXI-11-R           | GATTGTCGCCCAATAACCA                               |

**Supplementary Table S2.** Sequences encoding myosin homologs retrieved from maize genome by BLASTP and TBLASTN searches

| No. | Chromosome |                          | BAC<br>Accession<br>No. | Length<br>(kb) | Exon       | Gene<br>Accession<br>No. | No. of<br>Amino<br>Acid | MW<br>(kDa)      | pI   | Domains |        |                 |
|-----|------------|--------------------------|-------------------------|----------------|------------|--------------------------|-------------------------|------------------|------|---------|--------|-----------------|
|     | No.        | Position (bp)<br>From to |                         |                |            |                          |                         |                  |      |         | Strand |                 |
| 1   | 1          | 229190070                | 229205919               | -              | AC212453.4 | 15.850                   | 23                      | GRMZM2G113202    | 1191 | 133.472 | 8.53   | MH, IQ, CC      |
| 2   | 1          | 279808989                | 279812370               | +              | AC186902.4 | 3.382                    | 11                      | GRMZM2G174083    | 576  | 65.536  | 9.41   | MH, IQ          |
| 3   | 1          | 300108722                | 300149560               | -              | AC194061.3 | 40.839                   | 38                      | GRMZM2G471108    | 1506 | 170.675 | 7.70   | MH, IQ, DIL     |
| 4   | 2          | 166318980                | 166322361               | +              | AC217911.3 | 3.382                    | 11                      | GRMZM2G066638    | 576  | 65.536  | 9.41   | MH, IQ          |
| 5   | 3          | 203463334                | 203479533               | +              | AC186669.3 | 16.200                   | 19                      | GRMZM2G113319    | 712  | 80.298  | 7.00   | MH              |
| 6   | 3          | 203500963                | 203507842               | +              | AC195154.3 | 6.880                    | 20                      | AC195154.3_FG004 | 1181 | 132.743 | 5.61   | DIL             |
| 7   | 3          | 220883061                | 220902116               | -              | AC155377.1 | 19.056                   | 39                      | AC155377.1_FG001 | 1529 | 173.465 | 8.53   | MH, IQ, DIL     |
| 8   | 4          | 176870473                | 176897290               | -              | AC186563.4 | 26.818                   | 38                      | GRMZM2G449909    | 1520 | 173.204 | 8.85   | MH, IQ, CC, DIL |
| 9   | 5          | 7359267                  | 7367484                 | -              | AC208084.3 | 8.218?                   | 34                      | GRMZM2G460396    | 990  | 113.532 | 8.01   | MH, IQ          |
| 10  | 5          | 25983026                 | 25994059                | -              | AC210058.3 | 11.034                   | 23                      | GRMZM2G139583    | 1194 | 134.072 | 8.50   | MH, IQ, CC      |
| 11  | 5          | 36445589                 | 36472676                | +              | AC211332.4 | 27.088                   | 19                      | GRMZM2G478078    | 561  | 63.417  | 6.31   | MH              |
| 12  | 5          | 36513549                 | 36530714                | +              | AC208533.3 | 17.166                   | 18                      | GRMZM2G110976    | 525  | 60.762  | 9.47   | DIL             |
| 13  | 5          | 215701287                | 215703407               | +              | AC208470.3 | 2.121                    | 8                       | GRMZM2G332687    | 457  | 50.738  | 6.52   | MH              |
| 14  | 5          | 215703639                | 215714449               | +              | AC208470.3 | 10.811                   | 30                      | GRMZM2G034362    | 1046 | 119.027 | 9.04   | MH, IQ, DIL     |
| 15  | 6          | 161542870                | 161547726               | +              | AC203402.3 | 4.857                    | 15                      | GRMZM2G476843    | 625  | 70.851  | 6.86   | DIL             |
| 16  | 6          | 161483674                | 161486706               | +              | AC217943.4 | 3.033                    | 7                       | GRMZM2G445423    | 266  | 29.647  | 7.66   | MH              |
| 17  | 7          | 36208341                 | 36213235                | +              | AC204070.3 | 4.895                    | 12                      | GRMZM2G139712    | 457  | 50.738  | 6.52   | MH              |
| 18  | 7          | 36246283                 | 36261130                | +              | AC204070.3 | 14.848                   | 16?                     | GRMZM2G302553    | 527  | 59.691  | 5.31   | DIL             |
| 19  | 7          | 157571319                | 157580965               | -              | AC198603.3 | 9.647                    | 24                      | GRMZM2G057380    | 1238 | 139.825 | 9.13   | MH, IQ, CC      |
| 20  | 8          | 154746952                | 154761121               | -              | AC199632.4 | 14.170                   | 19                      | GRMZM2G058155    | 734  | 83.113  | 7.02   | MH              |
| 21  | 8          | 154701271                | 154704616               | -              | AC199632.4 | 3.345                    | 12                      | GRMZM2G306703    | 493  | 55.523  | 6.44   | DIL             |

---

|    |   |         |         |   |            |        |    |               |      |         |      |             |
|----|---|---------|---------|---|------------|--------|----|---------------|------|---------|------|-------------|
| 22 | 9 | 4288567 | 4298608 | - | AC211649.3 | 10.042 | 39 | GRMZM2G435294 | 1529 | 173.418 | 8.92 | MH, IQ, DIL |
|----|---|---------|---------|---|------------|--------|----|---------------|------|---------|------|-------------|

---

1, Grey and dark grey shading indicate the incomplete myosin sequences.

2, The paired colored sequences are two separated parts of a putative complete myosin gene.

3, Domains presented in the putative myosin sequences were determined using the PFAM and SMART databases.

4, MH, myosin head; IQ, putative calmdulin-binding motif; CC, coiled-coil; DIL, dilute.

**Supplementary Table S3.** Major domains presented in maize myosin proteins

| No.    | Accession number | Domain predicted |             |         |               |           |             |           |         |           |              |
|--------|------------------|------------------|-------------|---------|---------------|-----------|-------------|-----------|---------|-----------|--------------|
|        |                  | Myosin N         |             | Head    |               | IQ        |             | CC        |         | DIL       |              |
|        |                  | Range            | E-value     | Range   | E-value       | Range     | E-value     | Range     | E-value | Range     | E-value      |
| VIII-1 | GRMZM2G113202    | ---              | ---         | 193-849 | $9e^{-225}$   | 867-883   | 0.073       | 981-1039  | 1090    | ---       | ---          |
|        |                  |                  |             |         |               | 885-907   | 13.6        |           |         |           |              |
|        |                  |                  |             |         |               | 913-932   | 0.00014     |           |         |           |              |
|        |                  |                  |             |         |               | 936-953   | 0.025       |           |         |           |              |
| VIII-2 | GRMZM2G139583    | ---              | ---         | 276-933 | $2.8e^{-226}$ | 951-967   | 0.078       | 1065-1123 | ---     | ---       | ---          |
|        |                  |                  |             |         |               | 969-991   | 1.28e       |           |         |           |              |
|        |                  |                  |             |         |               | 997-1016  | 0.00015     |           |         |           |              |
|        |                  |                  |             |         |               | 1020-1037 | 0.027       |           |         |           |              |
| VIII-3 | GRMZM2G057380    | ---              | ---         | 219-875 | $2.9e^{-218}$ | 888-910   | 1.32e       | 1023-1072 | ---     | ---       | ---          |
|        |                  |                  |             |         |               | 911-933   | 1.09e       |           |         |           |              |
|        |                  |                  |             |         |               | 937-959   | 4.13e       |           |         |           |              |
|        |                  |                  |             |         |               | 965-982   | 0.0019      |           |         |           |              |
| XI-1   | GRMZM2G471108    | 23-60            | $2.9e^{-8}$ | 76-731  | $2.4e^{-236}$ | 749-766   | 0.0066      | 888-1062  | ---     | 1325-1432 | $8e^{-37}$   |
|        |                  |                  |             |         |               | 711-789   | 0.0082      |           |         |           |              |
|        |                  |                  |             |         |               | 797-814   | 0.1         |           |         |           |              |
|        |                  |                  |             |         |               | 816-838   | $2.74e^2$   |           |         |           |              |
|        |                  |                  |             |         |               | 843-862   | $2.8e^{-5}$ |           |         |           |              |
|        |                  |                  |             |         |               | 867-886   | 0.085       |           |         |           |              |
| XI-2   | KF493895         | 11-47            | $6.4e^{-9}$ | 64-719  | $7.8e^{-241}$ | 733-755   | 16          | 1424-1612 | 1610    | 1924-1993 | $1.4e^{-19}$ |
|        |                  |                  |             |         |               | 781-803   | 140         |           |         |           |              |
|        |                  |                  |             |         |               | 804-826   | 70          |           |         |           |              |
|        |                  |                  |             |         |               | 829-851   | 12.1        |           |         |           |              |
|        |                  |                  |             |         |               | 855-874   | 0.065       |           |         |           |              |

|      |                  |       |              |         |               |         |           |          |       |           |              |
|------|------------------|-------|--------------|---------|---------------|---------|-----------|----------|-------|-----------|--------------|
| XI-3 | AC155377.1-FG001 | 11-49 | $8.2e^{-13}$ | 64-719  | $5.4e^{-242}$ | 736-754 | 0.048     | ---      | ---   | 1347-1453 | $2.8e^{-35}$ |
|      |                  |       |              |         |               | 759-777 | 0.00081   |          |       |           |              |
|      |                  |       |              |         |               | 784-802 | 0.0037    |          |       |           |              |
|      |                  |       |              |         |               | 807-826 | 0.034     |          |       |           |              |
|      |                  |       |              |         |               | 831-851 | 0.012     |          |       |           |              |
|      |                  |       |              |         |               | 856-874 | 0.13      |          |       |           |              |
| XI-4 | GRMZM2G449909    | 9-44  | 0.02         | 62-719  | $1.8e^{-231}$ | 758-777 | 0.001     | 973-1054 | 55100 | 1334-1440 | $3e^{-33}$   |
|      |                  |       |              |         |               | 783-802 | 0.0087    |          |       |           |              |
|      |                  |       |              |         |               | 808-825 | 0.0004    |          |       |           |              |
|      |                  |       |              |         |               | 831-844 | 0.17      |          |       |           |              |
|      |                  |       |              |         |               | 854-874 | 0.031     |          |       |           |              |
| XI-5 | GRMZM2G460396    | ---   | ---          | 1-653   | $9e^{-238}$   | 670-688 | 0.045     |          |       |           |              |
|      |                  |       |              |         |               | 690-712 | 1.9e      |          |       |           |              |
|      |                  |       |              |         |               | 718-736 | 0.0023    |          |       |           |              |
|      |                  |       |              |         |               | 738-760 | $1.33e^2$ |          |       |           |              |
|      |                  |       |              |         |               | 763-785 | 3.91e     |          |       |           |              |
|      |                  |       |              |         |               | 789-808 | 0.03      |          |       |           |              |
| XI-6 | KF493897         | 7-26  | 0.079        | 65-751  | $3.1e^{-220}$ | 769-786 | 0.4       | 942-1080 | 2190  | 1335-1440 | $2.3e^{-32}$ |
|      |                  |       |              |         |               | 788-810 | 191       |          |       |           |              |
|      |                  |       |              |         |               | 813-835 | 9.73      |          |       |           |              |
|      |                  |       |              |         |               | 836-858 | 61        |          |       |           |              |
|      |                  |       |              |         |               | 864-876 | 0.36      |          |       |           |              |
|      |                  |       |              |         |               | 886-906 | 0.3       |          |       |           |              |
| XI-7 | KF493892         | 51-88 | $2.5e^{-9}$  | 104-760 | $1.1e^{-20}$  | 777-795 | 0.05      | ---      | ---   | 1375-1482 | $8e^{-37}$   |
|      |                  |       |              |         |               | 799-819 | 0.0015    |          |       |           |              |
|      |                  |       |              |         |               | 825-843 | 0.0065    |          |       |           |              |
|      |                  |       |              |         |               | 848-866 | 0.0083    |          |       |           |              |
|      |                  |       |              |         |               | 872-891 | 0.00021   |          |       |           |              |
|      |                  |       |              |         |               | 896-915 | 0.00084   |          |       |           |              |

|       |               |       |                    |        |                      |         |                    |           |       |           |                     |
|-------|---------------|-------|--------------------|--------|----------------------|---------|--------------------|-----------|-------|-----------|---------------------|
| XI-8  | KF493894      | 11-48 | 1.7e <sup>-7</sup> | 65-610 | 3.2e <sup>-202</sup> | 633-652 | 0.0085             | 959-1088  | 2190  | 1794-1898 | 6.9e <sup>-29</sup> |
|       |               |       |                    |        |                      | 724-742 | 0.69               | 1140-1252 | 1970  |           |                     |
|       |               |       |                    |        |                      | 744-766 | 4.46               | 1311-1399 | 64400 |           |                     |
| XI-9  | KF493893      | 11-48 | 4.8e <sup>-6</sup> | 64-718 | 2.1e <sup>-231</sup> | 736-753 | 0.0011             | ---       | ---   | 1326-1433 | 1.3e <sup>-35</sup> |
|       |               |       |                    |        |                      | 759-776 | 0.054              |           |       |           |                     |
|       |               |       |                    |        |                      | 783-801 | 0.0024             |           |       |           |                     |
|       |               |       |                    |        |                      | 807-825 | 0.12               |           |       |           |                     |
|       |               |       |                    |        |                      | 830-849 | 7.8e <sup>-6</sup> |           |       |           |                     |
|       |               |       |                    |        |                      | 854-873 | 0.0021             |           |       |           |                     |
| XI-10 | KF493896      | 11-46 | 1.2e <sup>-7</sup> | 64-719 | 3.2e <sup>-241</sup> | 736-754 | 0.9                | 1199-1285 | 1570  | 1698-1803 | 8.7e <sup>-31</sup> |
|       |               |       |                    |        |                      | 808-825 | 0.95               | 1315-1390 | 1520  |           |                     |
|       |               |       |                    |        |                      | 832-845 | 0.84               |           |       |           |                     |
|       |               |       |                    |        |                      | 855-874 | 0.045              |           |       |           |                     |
| XI-11 | GRMZM2G435294 | 11-46 | 9.2e <sup>-5</sup> | 64-720 | 3.6e <sup>-241</sup> | 734-756 | 6.27e              | ---       | ---   | 1347-1453 | 7.8e <sup>-36</sup> |
|       |               |       |                    |        |                      | 759-778 | 0.029              |           |       |           |                     |
|       |               |       |                    |        |                      | 785-804 | 0.033              |           |       |           |                     |
|       |               |       |                    |        |                      | 805-827 | 8.05e              |           |       |           |                     |
|       |               |       |                    |        |                      | 835-852 | 0.029              |           |       |           |                     |
|       |               |       |                    |        |                      | 856-875 | 0.017              |           |       |           |                     |

1, Domains presented in the putative myosin sequences were determined using the PFAM and SMART databases.

2, Myosin N, N-terminal SH3-like; Head, myosin head; IQ, putative calmodulin-binding motif; CC, coiled-coil; DIL, dilute.



**Supplementary Table S4.** Analysis of intron and exon sizes and intron phases in maize myosins

| Number           |              | Class VIII |        |        | Class XI |      |      |      |      |      |      |      |      |       |       |
|------------------|--------------|------------|--------|--------|----------|------|------|------|------|------|------|------|------|-------|-------|
|                  |              | VIII-1     | VIII-2 | VIII-3 | XI-1     | XI-2 | XI-3 | XI-4 | XI-5 | XI-6 | XI-7 | XI-8 | XI-9 | XI-10 | XI-11 |
| <b>Exon1</b>     | <b>Size</b>  | 417        | 564    | 1199   | 218      | 282  | 378  | 325  | 135  | 135  | 252  | 438  | 246  | 315   | 45    |
| <b>Intron1-2</b> | <b>Size</b>  | 1918       | 1676   | 554    | 476      | 687  | 2965 | 957  | 76   | 158  | 160  | 770  | 1547 | 712   | 176   |
|                  | <b>Phase</b> | 0          | 0      | 0      | 0        | 0    | 0    | 0    | -    | 0    | 0    | 0    | 0    | 0     | 0     |
| <b>Exon2</b>     | <b>Size</b>  | 102        | 102    | 102    | 144      | 129  | 129  | 150  | 144  | 144  | 144  | 129  | 129  | 129   | 129   |
| <b>Intron2-3</b> | <b>Size</b>  | 85         | 79     | 80     | 756      | 2363 | 595  | 764  | 98   | 264  | 125  | 499  | 425  | 2557  | 110   |
|                  | <b>Phase</b> | 0          | 0      | 0      | 0        | 0    | 0    | 0    | 0    | 0    | 0    | 0    | 0    | 0     | 0     |
| <b>Exon3</b>     | <b>Size</b>  | 144        | 144    | 144    | 146      | 144  | 144  | 146  | 146  | 146  | 146  | 144  | 144  | 144   | 144   |
| <b>Intron3-4</b> | <b>Size</b>  | 71         | 77     | 268    | 87       | 83   | 88   | 80   | 69   | 85   | 150  | 103  | 224  | 84    | 146   |
|                  | <b>Phase</b> | 0          | 0      | 0      | 2        | 0    | 0    | 2    | 2    | 2    | 2    | 0    | 0    | 0     | 0     |
| <b>Exon4</b>     | <b>Size</b>  | 151        | 151    | 151    | 157      | 146  | 146  | 160  | 157  | 157  | 157  | 146  | 146  | 146   | 146   |
| <b>Intron4-5</b> | <b>Size</b>  | 79         | 76     | 79     | 319      | 103  | 108  | 378  | 101  | 108  | 95   | 113  | 79   | 104   | 214   |
|                  | <b>Phase</b> | 1          | 1      | 1      | 0        | 2    | 2    | 0    | 0    | 0    | 0    | 2    | 2    | 2     | 2     |
| <b>Exon5</b>     | <b>Size</b>  | 28         | 28     | 28     | 59       | 157  | 157  | 59   | 59   | 59   | 59   | 157  | 157  | 157   | 157   |
| <b>Intron5-6</b> | <b>Size</b>  | 844        | 836    | 90     | 93       | 137  | 114  | 304  | 69   | 318  | 96   | 148  | 203  | 138   | 742   |
|                  | <b>Phase</b> | 2          | 2      | 2      | 2        | 0    | 0    | 2    | 2    | 2    | 2    | 0    | 0    | 0     | 0     |
| <b>Exon6</b>     | <b>Size</b>  | 166        | 166    | 166    | 160      | 59   | 59   | 157  | 160  | 157  | 160  | 59   | 59   | 59    | 59    |
| <b>Intron6-7</b> | <b>Size</b>  | 84         | 75     | 88     | 447      | 6372 | 91   | 1353 | 88   | 1439 | 201  | 167  | 128  | 4646  | 121   |
|                  | <b>Phase</b> | 0          | 0      | 0      | 0        | 2    | 2    | 0    | 0    | 0    | 0    | 2    | 2    | 2     | 2     |
| <b>Exon7</b>     | <b>Size</b>  | 64         | 64     | 64     | 150      | 160  | 160  | 150  | 150  | 150  | 150  | 160  | 160  | 160   | 160   |
| <b>Intron7-8</b> | <b>Size</b>  | 107        | 108    | 113    | 84       | 98   | 111  | 134  | 109  | 100  | 89   | 72   | 184  | 98    | 84    |
|                  | <b>Phase</b> | 1          | 1      | 1      | 0        | 0    | 0    | 0    | 0    | 0    | 0    | 0    | 0    | 0     | 0     |
| <b>Exon8</b>     | <b>Size</b>  | 14         | 14     | 14     | 137      | 150  | 150  | 137  | 137  | 137  | 137  | 150  | 150  | 150   | 150   |
| <b>Intron8-9</b> | <b>Size</b>  | 91         | 85     | 80     | 86       | 92   | 81   | 491  | 79   | 2379 | 86   | 84   | 85   | 107   | 98    |
|                  | <b>Phase</b> | 0          | 0      | 0      | 2        | 0    | 0    | 2    | 2    | 2    | 2    | 0    | 0    | 0     | 0     |

|                    |              |             |      |     |      |      |             |      |     |              |     |       |      |      |     |
|--------------------|--------------|-------------|------|-----|------|------|-------------|------|-----|--------------|-----|-------|------|------|-----|
| <b>Exon9</b>       | <b>Size</b>  | 85          | 85   | 85  | 147  | 137  | 137         | 147  | 147 | 147          | 147 | 137   | 137  | 137  | 137 |
| <b>Intron9-10</b>  | <b>Size</b>  | 211         | 213  | 187 | 111  | 95   | 90          | 70   | 119 | 71           | 127 | 149   | 78   | 100  | 92  |
|                    | <b>Phase</b> | 1           | 1    | 1   | 2    | 2    | 2           | 2    | 2   | 2            | 2   | 2     | 2    | 2    | 2   |
| <b>Exon10</b>      | <b>Size</b>  | 104         | 104  | 104 | 102  | 147  | 147         | 102  | 102 | 102          | 102 | 147   | 147  | 147  | 147 |
| <b>Exon10-11</b>   | <b>Size</b>  | 111         | 109  | 91  | 3641 | 74   | 89          | 360  | 90  | 868          | 670 | 82    | 99   | 74   | 100 |
|                    | <b>Phase</b> | 0           | 0    | 0   | 2    | 2    | 2           | 2    | 2   | 2            | 2   | 2     | 2    | 2    | 2   |
| <b>Exon11</b>      | <b>Size</b>  | 139         | 139  | 139 | 58   | 102  | 102         | 58   | 58  | 58           | 58  | 102   | 102  | 102  | 102 |
| <b>Intron11-12</b> | <b>Size</b>  | 776         | 795  | 106 | 114  | 96   | 89          | 85   | 104 | 81           | 100 | 93    | 4282 | 95   | 81  |
|                    | <b>Phase</b> | 1           | 1    | 1   | 0    | 2    | 2           | 0    | 0   | 0            | 0   | 2     | 2    | 2    | 2   |
| <b>Exon12</b>      | <b>Size</b>  | 119         | 119  | 119 | 102  | 58   | 58          | 102  | 102 | 102          | 102 | 58    | 58   | 58   | 58  |
| <b>Intron12-13</b> | <b>Size</b>  | <u>5068</u> | 97   | 84  | 943  | 83   | 75          | 1140 | 80  | <u>17674</u> | 402 | 78    | 82   | 83   | 101 |
|                    | <b>Phase</b> | 0           | 0    | 0   | 0    | 0    | 0           | 0    | 0   | 0            | 0   | 0     | 0    | 0    | 0   |
| <b>Exon13</b>      | <b>Size</b>  | 153         | 153  | 153 | 38   | 102  | 102         | 38   | 38  | 38           | 38  | 102   | 102  | 102  | 102 |
| <b>Intron13-14</b> | <b>Size</b>  | 79          | 251  | 79  | 90   | 199  | 1304        | 84   | 134 | 74           | 109 | 111   | 331  | 1387 | 661 |
|                    | <b>Phase</b> | 0           | 0    | 0   | 2    | 0    | 0           | 2    | 2   | 2            | 2   | 0     | 0    | 0    | 0   |
| <b>Exon14</b>      | <b>Size</b>  | 90          | 90   | 90  | 127  | 38   | 35          | 127  | 127 | 127          | 127 | 38    | 38   | 38   | 38  |
| <b>Intron14-15</b> | <b>Size</b>  | 379         | 341  | 882 | 3111 | 291  | 144         | 89   | 84  | 98           | 76  | 149   | 70   | 105  | 91  |
|                    | <b>Phase</b> | 0           | 0    | 0   | 0    | 2    | 2           | 0    | 0   | 0            | 0   | 2     | 2    | 2    | 2   |
| <b>Exon15</b>      | <b>Size</b>  | 78          | 78   | 78  | 168  | 127  | 127         | 174  | 171 | 174          | 171 | 127   | 127  | 127  | 127 |
| <b>Intron15-16</b> | <b>Size</b>  | 1167        | 1143 | 583 | 73   | 121  | 88          | 549  | 72  | 429          | 81  | 85    | 8890 | 118  | 109 |
|                    | <b>Phase</b> | 0           | 0    | 0   | 0    | 0    | 0           | 0    | 0   | 0            | 0   | 0     | 0    | 0    | 0   |
| <b>Exon16</b>      | <b>Size</b>  | 159         | 159  | 159 | 132  | 168  | 171         | 132  | 132 | 132          | 132 | 165   | 165  | 168  | 171 |
| <b>Intron16-17</b> | <b>Size</b>  | 112         | 110  | 148 | 755  | 2618 | <u>4508</u> | 1384 | 111 | 169          | 82  | 24525 | 76   | 1079 | 100 |
|                    | <b>Phase</b> | 0           | 0    | 0   | 0    | 0    | 0           | 0    | 0   | 0            | 0   | 0     | 0    | 0    | 0   |
| <b>Exon17</b>      | <b>Size</b>  | 204         | 204  | 201 | 110  | 132  | 132         | 110  | 107 | 110          | 110 | 277   | 132  | 132  | 132 |
| <b>Intron17-18</b> | <b>Size</b>  | 90          | 90   | 363 | 75   | 84   | 70          | 586  | 128 | 148          | 87  | 105   | 847  | 84   | 85  |
|                    | <b>Phase</b> | 0           | 0    | 0   | 2    | 0    | 0           | 2    | 2   | 2            | 2   | 1     | 0    | 0    | 0   |

|                    |              |      |     |     |              |             |     |             |     |              |      |       |      |      |     |
|--------------------|--------------|------|-----|-----|--------------|-------------|-----|-------------|-----|--------------|------|-------|------|------|-----|
| <b>Exon18</b>      | <b>Size</b>  | 206  | 206 | 206 | 61           | 110         | 110 | 61          | 61  | 90           | 61   | 89    | 110  | 110s | 110 |
| <b>Intron18-19</b> | <b>Size</b>  | 72   | 79  | 95  | 285          | 80          | 93  | <u>6631</u> | 114 | 243          | 1676 | 123   | 82   | 82   | 111 |
|                    | <b>Phase</b> | 2    | 2   | 2   | 0            | 2           | 2   | 0           | 0   | 2            | 0    | 0     | 2    | 2    | 2   |
| <b>Exon19</b>      | <b>Size</b>  | 133  | 136 | 136 | 178          | 61          | 61  | 178         | 178 | 61           | 178  | 120   | 61   | 61   | 61  |
| <b>Intron19-20</b> | <b>Size</b>  | 191  | 190 | 153 | 103          | <u>9463</u> | 149 | 1023        | 100 | <u>22499</u> | 104  | 89    | 583  | ?    | 77  |
|                    | <b>Phase</b> | 0    | 0   | 0   | 1            | 0           | 0   | 1           | 1   | 0            | 1    | 0     | 0    | 0    | 0   |
| <b>Exon20</b>      | <b>Size</b>  | 130  | 139 | 130 | 206          | 178         | 178 | 206         | 206 | 178          | 206  | 99    | 178  | 178  | 178 |
| <b>Intron20-21</b> | <b>Size</b>  | 105  | 102 | 136 | 378          | 97          | 148 | 180         | 78  | <u>18061</u> | 598  | 85    | 90   | ?    | 76  |
|                    | <b>Phase</b> | 1    | 1   | 1   | 0            | 1           | 1   | 0           | 0   | 1            | 0    | 0     | 1    | 1    | 1   |
| <b>Exon21</b>      | <b>Size</b>  | 147  | 147 | 147 | 120          | 206         | 206 | 120         | 120 | 206          | 120  | 189   | 206  | 206  | 206 |
| <b>Intron21-22</b> | <b>Size</b>  | 99   | 100 | 86  | 257          | 145         | 117 | 210         | 83  | 222          | 117  | 237   | 2436 | ?    | 132 |
|                    | <b>Phase</b> | 1    | 1   | 1   | 0            | 0           | 0   | 0           | 0   | 0            | 0    | 0     | 0    | 0    | 0   |
| <b>Exon22</b>      | <b>Size</b>  | 80   | 80  | 125 | 99           | 120         | 120 | 99          | 99  | 120          | 99   | 140   | 120  | 120  | 120 |
| <b>Intron22-23</b> | <b>Size</b>  | 145  | 139 | 316 | <u>14936</u> | 74          | 89  | 609         | 90  | 2392         | 652  | 10185 | 4129 | ?    | 98  |
|                    | <b>Phase</b> | 0    | 0   | 0   | 0            | 0           | 0   | 0           | 0   | 0            | 0    | 2     | 0    | 0    | 0   |
| <b>Exon23</b>      | <b>Size</b>  | 1053 | 931 | 207 | 210          | 99          | 99  | 222         | 216 | 99           | 213  | 168   | 99   | 99   | 99  |
| <b>Intron23-24</b> | <b>Size</b>  |      |     | 83  | 100          | 167         | 94  | 160         | 84  | 266          | 139  | 3460  | ?    | ?    | 161 |
|                    | <b>Phase</b> |      |     | 0   | 0            | 0           | 0   | 0           | 0   | 0            | 0    | 2     | 0    | 0    | 0   |
| <b>Exon24</b>      | <b>Size</b>  |      |     | 956 | 140          | 189         | 222 | 140         | 140 | 222          | 140  | 168   | 210  | 189  | 219 |
| <b>Intron24-25</b> | <b>Size</b>  |      |     |     | 81           | 229         | 307 | 119         | 87  | 292          | 128  | 4038  | ?    | ?    | 167 |
|                    | <b>Phase</b> |      |     |     | 2            | 0           | 0   | 2           | 2   | 0            | 2    | 2     | 0    | 0    | 0   |
| <b>Exon25</b>      | <b>Size</b>  |      |     |     | 109          | 140         | 140 | 112         | 53  | 119          | 121  | 168   | 140  | 140  | 140 |
| <b>Intron25-26</b> | <b>Size</b>  |      |     |     | 210          | 2251        | 258 | 268         | 348 | 73           | 88   | 137   | 99   | ?    | 110 |
|                    | <b>Phase</b> |      |     |     | 0            | 2           | 2   | 0           | 1   | 2            | 0    | 2     | 2    | 2    | 2   |
| <b>Exon26</b>      | <b>Size</b>  |      |     |     | 36           | 168         | 115 | 51          | 167 | 91           | 39   | 167   | 109  | 14   | 112 |
| <b>Intron26-27</b> | <b>Size</b>  |      |     |     | 75           | 219         | 91  | 91          | 109 | 244          | 89   | 92    | 159  | 5798 | 97  |
|                    | <b>Phase</b> |      |     |     | 0            | 2           | 0   | 0           | 0   | 0            | 0    | 1     | 0    | 1    | 0   |

|                    |              |  |             |      |     |      |     |             |     |      |      |       |     |
|--------------------|--------------|--|-------------|------|-----|------|-----|-------------|-----|------|------|-------|-----|
| <b>Exon27</b>      | <b>Size</b>  |  | 57          | 168  | 54  | 90   | 101 | 84          | 84  | 148  | 39   | 148   | 51  |
| <b>Intron27-28</b> | <b>Size</b>  |  | 89          | 176  | 97  | 259  | 188 | 136         | 71  | 93   | 78   | 15389 | 101 |
|                    | <b>Phase</b> |  | 0           | 2    | 0   | 0    | 2   | 0           | 0   | 2    | 0    | 2     | 0   |
| <b>Exon28</b>      | <b>Size</b>  |  | 171         | 168  | 81  | 171  | 181 | 171         | 171 | 168  | 78   | 168   | 81  |
| <b>Intron28-29</b> | <b>Size</b>  |  | 120         | 150  | 126 | 95   | 106 | 76          | 562 | 111  | 99   | 164   | 85  |
|                    | <b>Phase</b> |  | 0           | 2    | 0   | 0    | 0   | 0           | 0   | 2    | 0    | 2     | 0   |
| <b>Exon29</b>      | <b>Size</b>  |  | 150         | 168  | 171 | 144  | 156 | 150         | 156 | 168  | 171  | 168   | 171 |
| <b>Intron29-30</b> | <b>Size</b>  |  | <u>4893</u> | 76   | 699 | 1772 | 312 | 867         | 79  | 7925 | 234  | 100   | 108 |
|                    | <b>Phase</b> |  | 0           | 2    | 0   | 0    | 0   | 0           | 0   | 2    | 0    | 2     | 0   |
| <b>Exon30</b>      | <b>Size</b>  |  | 204         | 168  | 153 | 177  | 207 | 177         | 186 | 136  | 150  | 168   | 156 |
| <b>Intron30-31</b> | <b>Size</b>  |  | 1280        | 77   | 93  | 76   | 74  | 140         | 137 | 809  | 564  | 239   | 86  |
|                    | <b>Phase</b> |  | 0           | 2    | 0   | 0    | 0   | 0           | 0   | 0    | 0    | 2     | 0   |
| <b>Exon31</b>      | <b>Size</b>  |  | 105         | 168  | 207 | 138  | 147 | 138         | 135 | 161  | 174  | 168   | 207 |
| <b>Intron31-32</b> | <b>Size</b>  |  | 83          | 1301 | 82  | 126  | 85  | 1042        | 81  | 96   | 1826 | 91    | 83  |
|                    | <b>Phase</b> |  | 0           | 2    | 0   | 0    | 0   | 0           | 0   | 2    | 0    | 2     | 0   |
| <b>Exon32</b>      | <b>Size</b>  |  | 71          | 168  | 141 | 71   | 71  | 71          | 71  | 210  | 153  | 210   | 144 |
| <b>Intron32-33</b> | <b>Size</b>  |  | 77          | 77   | 86  | 321  | 137 | 87          | 78  | 111  | 73   | 107   | 152 |
|                    | <b>Phase</b> |  | 2           | 2    | 0   | 2    | 2   | 2           | 2   | 2    | 0    | 2     | 0   |
| <b>Exon33</b>      | <b>Size</b>  |  | 100         | 168  | 71  | 100  | 100 | 97          | 100 | 124  | 71   | 126   | 71  |
| <b>Intron33-34</b> | <b>Size</b>  |  | 480         | 5244 | 74  | 541  | 216 | 81          | 70  | 76   | 90   | 83    | 100 |
|                    | <b>Phase</b> |  | 0           | 2    | 2   | 0    | 0   | 0           | 0   | 0    | 2    | 2     | 2   |
| <b>Exon34</b>      | <b>Size</b>  |  | 57          | 168  | 100 | 57   | 121 | 57          | 57  | 93   | 100  | 91    | 100 |
| <b>Intron34-35</b> | <b>Size</b>  |  | 250         | 155  | 76  | 86   |     | <u>8665</u> | 196 | 118  | 586  | 10073 | 117 |
|                    | <b>Phase</b> |  | 0           | 2    | 0   | 0    |     | 0           | 0   | 0    | 0    | 0     | 0   |
| <b>Exon35</b>      | <b>Size</b>  |  | 57          | 189  | 57  | 57   |     | 57          | 57  | 72   | 57   | 81    | 57  |
| <b>Intron35-36</b> | <b>Size</b>  |  | 75          | 58   | 80  | 90   |     | 219         | 128 | 89   | 8200 | 75    | 99  |
|                    | <b>Phase</b> |  | 0           | 2    | 0   | 0    |     | 0           | 0   | 0    | 0    | 0     | 0   |

|                    |              |  |     |     |     |     |  |     |     |      |     |     |     |
|--------------------|--------------|--|-----|-----|-----|-----|--|-----|-----|------|-----|-----|-----|
| <b>Exon36</b>      | <b>Size</b>  |  | 81  | 168 | 57  | 81  |  | 81  | 81  | 186  | 57  | 195 | 57  |
| <b>Intron36-37</b> | <b>Size</b>  |  | 73  | 579 | 94  | 89  |  | 75  | 262 | 157  | 297 | 344 | 86  |
|                    | <b>Phase</b> |  | 0   | 2   | 0   | 0   |  | 0   | 0   | 0    | 0   | 0   | 0   |
| <b>Exon37</b>      | <b>Size</b>  |  | 89  | 168 | 81  | 83  |  | 83  | 83  | 345  | 81  | 339 | 81  |
| <b>Intron37-38</b> | <b>Size</b>  |  | 105 | 423 | 118 | 133 |  | 119 | 89  | 79   | 337 | 79  | 79  |
|                    | <b>Phase</b> |  | 2   | 2   | 0   | 2   |  | 2   | 2   | 0    | 0   | 0   | 0   |
| <b>Exon38</b>      | <b>Size</b>  |  | 706 | 168 | 83  | 499 |  | 444 | 20  | 138  | 86  | 132 | 83  |
| <b>Intron38-39</b> | <b>Size</b>  |  |     | 105 | 85  |     |  |     | 130 | 82   | 79  | 91  | 97  |
|                    | <b>Phase</b> |  |     | 2   | 2   |     |  |     | 1   | 0    | 2   | 0   | 2   |
| <b>Exon39</b>      | <b>Size</b>  |  |     | 165 | 549 |     |  |     | 95  | 71   | 627 | 71  | 201 |
| <b>Intron39-40</b> | <b>Size</b>  |  |     | 134 |     |     |  |     |     | 92   |     | 73  |     |
|                    | <b>Phase</b> |  |     | 2   |     |     |  |     |     | 2    |     | 2   |     |
| <b>Exon40</b>      | <b>Size</b>  |  |     | 168 |     |     |  |     |     | 100  |     | 100 |     |
| <b>Intron40-41</b> | <b>Size</b>  |  |     | 189 |     |     |  |     |     | 1231 |     | 73  |     |
|                    | <b>Phase</b> |  |     | 2   |     |     |  |     |     | 0    |     | 0   |     |
| <b>Exon41</b>      | <b>Size</b>  |  |     | 210 |     |     |  |     |     | 57   |     | 57  |     |
| <b>Intron41-42</b> | <b>Size</b>  |  |     | 111 |     |     |  |     |     | 110  |     | 235 |     |
|                    | <b>Phase</b> |  |     | 2   |     |     |  |     |     | 0    |     | 0   |     |
| <b>Exon42</b>      | <b>Size</b>  |  |     | 121 |     |     |  |     |     | 57   |     | 57  |     |
| <b>Intron42-43</b> | <b>Size</b>  |  |     | 80  |     |     |  |     |     | 405  |     | 82  |     |
|                    | <b>Phase</b> |  |     | 0   |     |     |  |     |     | 0    |     | 0   |     |
| <b>Exon43</b>      | <b>Size</b>  |  |     | 93  |     |     |  |     |     | 81   |     | 81  |     |
| <b>Intron43-44</b> | <b>Size</b>  |  |     | 94  |     |     |  |     |     | 89   |     | 100 |     |
|                    | <b>Phase</b> |  |     | 0   |     |     |  |     |     | 0    |     | 0   |     |
| <b>Exon44</b>      | <b>Size</b>  |  |     | 81  |     |     |  |     |     | 83   |     | 83  |     |
| <b>Intron44-45</b> | <b>Size</b>  |  |     | 77  |     |     |  |     |     | 101  |     | 99  |     |
|                    | <b>Phase</b> |  |     | 0   |     |     |  |     |     | 2    |     | 2   |     |

|                    |              |  |     |  |     |     |
|--------------------|--------------|--|-----|--|-----|-----|
| <b>Exon45</b>      | <b>Size</b>  |  | 195 |  | 115 | 575 |
| <b>Intron45-46</b> | <b>Size</b>  |  | 348 |  |     |     |
|                    | <b>Phase</b> |  | 0   |  |     |     |
| <b>Exon46</b>      | <b>Size</b>  |  | 345 |  |     |     |
| <b>Intron46-47</b> | <b>Size</b>  |  | 79  |  |     |     |
|                    | <b>Phase</b> |  | 0   |  |     |     |
| <b>Exon47</b>      | <b>Size</b>  |  | 132 |  |     |     |
| <b>Intron47-48</b> | <b>Size</b>  |  | 86  |  |     |     |
|                    | <b>Phase</b> |  | 0   |  |     |     |
| <b>Exon48</b>      | <b>Size</b>  |  | 71  |  |     |     |
| <b>Intron48-49</b> | <b>Size</b>  |  | 79  |  |     |     |
|                    | <b>Phase</b> |  | 2   |  |     |     |
| <b>Exon49</b>      | <b>Size</b>  |  | 100 |  |     |     |
| <b>Intron49-50</b> | <b>Size</b>  |  | 75  |  |     |     |
|                    | <b>Phase</b> |  | 0   |  |     |     |
| <b>Exon50</b>      | <b>Size</b>  |  | 57  |  |     |     |
| <b>Intron50-51</b> | <b>Size</b>  |  | 130 |  |     |     |
|                    | <b>Phase</b> |  | 0   |  |     |     |
| <b>Exon51</b>      | <b>Size</b>  |  | 480 |  |     |     |
| <b>Intron51-52</b> | <b>Size</b>  |  | 80  |  |     |     |
|                    | <b>Phase</b> |  | 0   |  |     |     |
| <b>Exon52</b>      | <b>Size</b>  |  | 441 |  |     |     |

The number colored in red represents the uncertain fragment length because of the loss of the genomic data in current maize genome release.

**Supplementary Table S5.** Analysis of repetitive sequences presented in the large introns (> 1 kb) in maize myosins using the RepeatMasker program

| No. of Genes | No. of Intron | Retroelements |            |           | DNA Transposon |                |                   | Others |            |                |
|--------------|---------------|---------------|------------|-----------|----------------|----------------|-------------------|--------|------------|----------------|
|              |               | Length        | Percentage | Clade     | Length         | Percentage     | Clade             | Length | Percentage | Clade          |
| VIII-1       | 1-2           | -             | -          | -         | 296            | 15.43          | -                 | 51     | 2.66       | Low complexity |
|              | 12-13         | 4203          | 82.93      | Ty1/Copia | -              | -              | -                 | -      | -          | -              |
|              | 15-16         | -             | -          | -         | -              | -              | -                 | -      | -          | -              |
| VIII-2       | 1-2           |               |            |           | 408(2)         | 24.34          | hobo-Activator    |        |            |                |
|              |               |               |            |           | 233            | 13.90          | Tc1-IS630-Pogo    | -      | -          | -              |
|              |               |               |            |           | 178            | 10.62          | Tourist/Harbinger |        |            |                |
|              | 15-16         | -             | -          | -         | -              | -              | -                 | -      | -          | -              |
| VIII-3       | -             | -             | -          | -         | -              | -              | -                 | -      | -          | -              |
| XI-1         | 10-11         | 1518(2)       | 41.69      | L1/CIN4   | 299(2)         | 8.21           | Tourist/Harbinger | -      | -          | -              |
|              |               | 266           | 7.31       | Ty1/Copia |                |                |                   |        |            |                |
|              | 14-15         | 1068          | 34.33      | L1/CIN4   | 155            | 4.98           | hobo-Activator    | -      | -          | -              |
|              |               | 899           | 28.90      | Ty1/Copia |                |                |                   |        |            |                |
|              | 22-23         | 146           | 0.98       | SINEs     |                |                |                   | 146    | 0.98       | Small RNA      |
|              |               | 6883(5)       | 46.08      | L1/CIN4   | -              | -              | -                 | 26     | 0.17       | Simple repeats |
| 29-30        | 5257(5)       | 35.20         | Ty1/Copia  |           |                |                |                   |        |            |                |
|              | 1050          | 21.46         | L1/CIN4    | 165       | 3.37           | hobo-Activator | -                 | -      | -          |                |
| 2569         | 52.50         | Ty1/Copia     |            |           |                |                |                   |        |            |                |
| 30-31        | 125           | 9.77          | L1/CIN4    | -         | -              | -              | -                 | -      | -          |                |
| XI-2         | 2-3           | 514           | 21.75      | L1/CIN4   | -              | -              | -                 | -      | -          | -              |

|             |       |         |             |             |        |       |                   |        |      |                |
|-------------|-------|---------|-------------|-------------|--------|-------|-------------------|--------|------|----------------|
|             |       | 497(2)  | 21.03       | Ty1/Copia   |        |       |                   |        |      |                |
|             | 6-7   | 3593(3) | 62.04       | Ty1/Copia   | 655    | 10.28 | hobo-Activator    | -      | -    | -              |
|             | 16-17 | 57      | 2.18        | L1/CIN4     | -      | -     | -                 | -      | -    | -              |
|             |       | 1193    | 45.57       | Ty1/Copia   |        |       |                   |        |      |                |
|             | 19-20 | 6928(4) | 73.21       | L1/CIN4     | 88     | 0.93  | hobo-Activator    | -      | -    | -              |
|             | 25-26 | 1223    | 54.33       | L1/CIN4     |        |       |                   |        |      |                |
|             |       | 215     | 9.55        | Gypsy/DIRS1 |        |       |                   |        |      |                |
|             | 29-30 | 3250(2) | 40.54       | Ty1/Copia   | 148(2) | 1.85  | Tourist/Harbinger | 149    | 1.86 | Unclassified   |
|             |       |         |             |             |        |       |                   | 133(4) | 1.66 | Simple repeats |
| <b>XI-3</b> | 1-2   | 284     | 9.58        | L1/CIN4     | 212    | 7.15  | -                 | -      | -    | -              |
|             | 13-14 | -       | -           | -           | -      | -     | -                 | 27     | 2.07 | Simple repeats |
|             | 16-17 | 371     | 8.23        | L1/CIN4     | -      | -     | -                 | -      | -    | -              |
| 1892(3)     |       | 41.97   | Gypsy/DIRS1 |             |        |       |                   |        |      |                |
| <b>XI-4</b> | 6-7   | 316     | 23.36       | RTE/Bov-B   | -      | -     | -                 | -      | -    | -              |
|             | 12-13 | -       | -           | -           | -      | -     | -                 | -      | -    | -              |
|             | 16-17 | -       | -           | -           | 84     | 6.07  | Tc1-IS630-Pogo    | -      | -    | -              |
|             | 18-19 | 105     | 1.58        | L1/CIN4     | 130    | 1.96  | Tourist/Harbinger | -      | -    | -              |
|             |       | 4279    | 64.53       | Ty1/Copia   |        |       |                   |        |      |                |
| 19-20       | 327   | 31.96   | RTE/Bov-B   | -           | -      | -     | -                 | -      | -    |                |



|             |         |                    |                |                      |       |                   |                |        |      |                |   |
|-------------|---------|--------------------|----------------|----------------------|-------|-------------------|----------------|--------|------|----------------|---|
|             | 29-30   | 767(3)<br>118      | 43.28<br>6.66  | L1/CIN4<br>Ty1/Copia | 146   | 8.24              | hobo-Activator | -      | -    | -              |   |
| <b>XI-5</b> | -       | -                  | -              | -                    | -     | -                 | -              | -      | -    | -              |   |
| <b>XI-6</b> | 6-7     | 415                | 28.84          | L1/CIN4              | -     | -                 | -              | 51     | 3.54 | Unclassified   |   |
|             | 8-9     | 1713               | 72.01          | Ty1/Copia            | -     | -                 | -              | -      | -    | -              |   |
|             | 12-13   | 2007(2)            | 11.36          | RTE/Bov-B            |       |                   |                |        |      |                |   |
|             |         | 7550(3)<br>5170(3) | 42.72<br>29.25 | L1/CIN4<br>Ty1/Copia | -     | -                 | -              | -      | -    | -              | - |
|             | 19-20   | 46                 | 0.2            | RTE/Bov-B            |       |                   |                |        |      |                |   |
|             |         | 7617(9)<br>4512(6) | 33.85<br>20.05 | L1/CIN4<br>Ty1/Copia | -     | -                 | -              | 23     | 0.1  | Simple repeats |   |
|             |         | 4167               | 18.52          | Gypsy/DIRS1          |       |                   |                |        |      |                |   |
|             | 20-21   | 13171(2)           | 72.93          | Ty1/Copia            | -     | -                 | -              | -      | -    | -              | - |
| 930         |         | 5.15               | Gypsy/DIRS1    |                      |       |                   |                |        |      |                |   |
| 22-23       | 502     | 20.99              | RTE/Bov-B      | 127                  | 5.31  | Tourist/Harbinger | -              | -      | -    | -              |   |
|             | 54      | 2.26               | L1/CIN4        |                      |       |                   |                |        |      |                |   |
| 31-32       | -       | -                  | -              | 228(2)               | 21.88 | Tourist/Harbinger | -              | -      | -    | -              |   |
| 34-35       | 5443(2) | 62.82              | L1/CIN4        | 123                  | 1.42  | Tc1-IS630-Pogo    | -              | -      | -    | -              |   |
|             | 609(2)  | 7.03               | Ty1/Copia      |                      |       |                   |                |        |      |                |   |
| <b>XI-7</b> | 18-19   | 61                 | 3.64           | RTE/Bov-B            | 166   | 9.90              | Tc1-IS630-Pogo | -      | -    | -              |   |
|             |         | 223                | 13.31          | L1/CIN4              |       |                   |                |        |      |                |   |
| <b>XI-8</b> | 16-17   | 2620(3)            | 10.68          | L1/CIN4              |       |                   |                | 110    | 0.45 | Unclassified   |   |
|             |         | 13201(9)           | 53.83          | Ty1/Copia            | 138   | 0.56              | hobo-Activator | 157(2) | 0.64 | Simple repeats |   |
|             |         | 892(3)             | 3.64           | Gypsy/DIRS1          |       |                   |                |        |      |                |   |

|                |                 |                |                          |                          |              |                |                   |      |                |                |
|----------------|-----------------|----------------|--------------------------|--------------------------|--------------|----------------|-------------------|------|----------------|----------------|
|                | 22-23           | 7451(3)        | 73.16                    | Gypsy/DIRS1              | 863(3)<br>83 | 8.47<br>0.42   | Tourist/Harbinger | -    | -              | -              |
|                | 23-24           | 1309(6)        | 37.83                    | L1/CIN4                  |              |                |                   |      |                |                |
|                |                 | 56<br>149      | 1.62<br>4.31             | Gypsy/DIRS1<br>SINEs     | -            | -              | -                 | 149  | 4.31           | Small RNA      |
|                | 24-25           | 2300(4)        | 56.96                    | L1/CIN4                  |              |                |                   |      |                |                |
|                |                 | 132<br>36      | 3.27<br>0.89             | Ty1/Copia<br>Gypsy/DIRS1 | 291          | 7.21           | Tourist/Harbinger | -    | -              | -              |
|                | 29-30           | 2644           | 33.36                    | L1/CIN4                  |              |                |                   |      |                |                |
| 3670(5)<br>301 |                 | 46.31<br>3.80  | Ty1/Copia<br>-           | -                        | -            | -              | 32                | 0.40 | Simple repeats |                |
| 40-41          | 114             | 9.26           | L1/CIN4                  |                          |              |                |                   |      |                |                |
|                | 328             | 26.65          | Gypsy/DIRS1              | -                        | -            | -              | -                 | -    | -              |                |
| XI-9           | 1-2             | -              | -                        | -                        | 382          | 24.69          | hobo-Activator    | -    | -              | -              |
|                | 11-12           | 531(2)         | 12.40                    | L1/CIN4                  |              |                |                   |      |                |                |
|                |                 | 190(2)         | 4.44                     | Gypsy/DIRS1              | -            | -              | -                 | -    | -              | -              |
|                | 15-16           | 1474           | 16.58                    | L1/CIN4                  |              |                |                   | 62   | 0.70           | Unclassified   |
|                |                 | 3283(3)        | 36.93                    | Ty1/Copia                | 285(2)       | 3.21           | hobo-Activator    | 91   | 1.02           | Simple repeats |
|                | 21-22           | 1888           | 77.50                    | RTE/Bov-B                | -            | -              | -                 | -    | -              | -              |
| 22-23          | 1477            | 35.77          | Ty1/Copia                | -                        | -            | -              | -                 | -    | -              |                |
| 23-24          | 189(2)          | 1.88           | L1/CIN4                  |                          |              |                |                   |      |                |                |
|                | 4980(2)<br>1917 | 49.54<br>19.07 | Ty1/Copia<br>Gypsy/DIRS1 | 863                      | 8.58         | hobo-Activator | 87(3)             | 0.87 | Simple repeats |                |



## Supplementary Figures

### Supplementary Figure S1. Sequencing analysis of the alternative splicing events of some maize myosin genes.

**a**

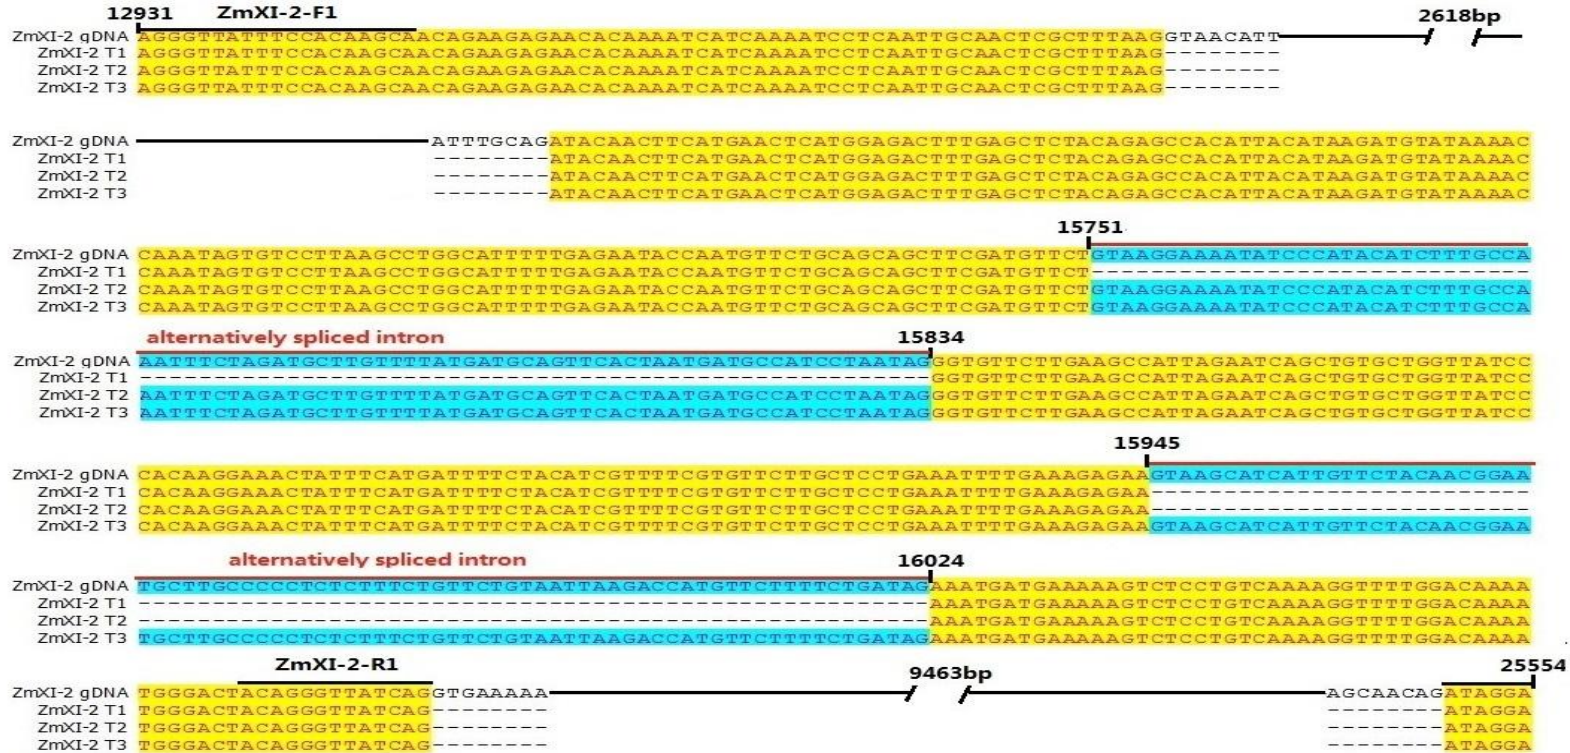

**b**

**I; I&II**

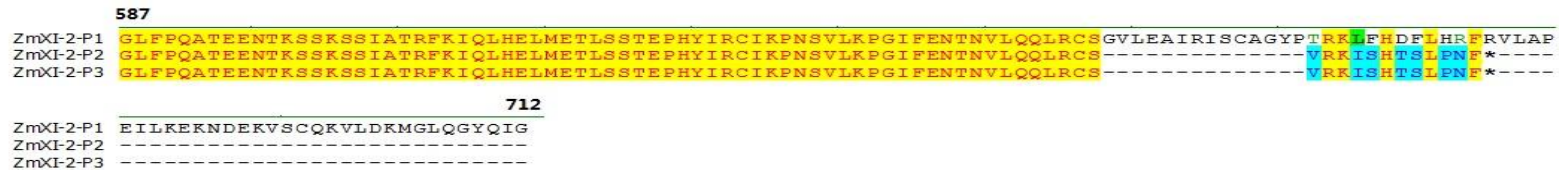

**7067 ZmXI-5-F**

ZmXI-5 qDNA **CGGACATCATCAGGCTTAGGCATAGCTAGTGGATACAGTGGAAATGGTGGGAAGGCCCTGACACTGATGCATCGATGGTAGAGGCCAAAATATCCAGCAC**  
 ZmXI-5 T1 **CGGACATCATCAGGCTTAGGCATAGCTAGTGGATACAGTGGAAATGGTGGGAAGGCCCTGACACTGATGCATCGATGGTAGAGGCCAAAATATCCAGCAC**  
 ZmXI-5 T2 **CGGACATCATCAGGCTTAGGCATAGCTAGTGGATACAGTGGAAATGGTGGGAAGGCCCTGACACTGATGCATCGATGGTAGAGGCCAAAATATCCAGCAC**  
 ZmXI-5 T3 **CGGACATCATCAGGCTTAGGCATAGCTAGTGGATACAGTGGAAATGGTGGGAAGGCCCTGACACTGATGCATCGATGGTAGAGGCCAAAATATCCAGCAC**

ZmXI-5 qDNA **TTCCGGTTCAAGCAACACTTGACAGCATATGTCGAGAAGATATACGGGATAATCAGAGATAACCTGAAGAAGGAAATAAGTCCGTTCTTGACAATGTG**  
 ZmXI-5 T1 **TTCCGGTTCAAGCAACACTTGACAGCATATGTCGAGAAGATATACGGGATAATCAGAGATAACCTGAAGAAGGAAATAAGTCCGTTCTTGACAATGTG**  
 ZmXI-5 T2 **TTCCGGTTCAAGCAACACTTGACAGCATATGTCGAGAAGATATACGGGATAATCAGAGATAACCTGAAGAAGGAAATAAGTCCGTTCTTGACAATGTG**  
 ZmXI-5 T3 **TTCCGGTTCAAGCAACACTTGACAGCATATGTCGAGAAGATATACGGGATAATCAGAGATAACCTGAAGAAGGAAATAAGTCCGTTCTTGACAATGTG**

**7268**

**Alternatively spliced intron**

**7341**

ZmXI-5 qDNA **CATACAGGTATAGCAACTAAGCCATTTCCCTTACCAGGATATGACGAAATACAATTTTCTAACCATTGTCGATTTTCATAGCTCCAAGAGCTAACC**  
 ZmXI-5 T1 **CATACAG-----GCTCCAAGAGCTAACC**  
 ZmXI-5 T2 **CATACAGGTATAGCAACTAAGCCATTTCCCTTACCAGGATATGACGAAATACAATTTTCTAACCATTGTCGATTTTCATAGCTCCAAGAGCTAACC**  
 ZmXI-5 T3 **CATACAG-----GCTCCAAGAGCTAACC**

ZmXI-5 qDNA **GTGTGAGGCCATCACGGGGATCACTAAAAAGCATACACTCTAATGCACTAGCTAGGCCAAGCATCAAGTCTGCATTGGCAAAAACATTGTCAAGTGCCT**  
 ZmXI-5 T1 **GTGTGAGGCCATCACGGGGATCACTAAAAAGCATACACTCTAATGCACTAGCTAGGCCAAGCATCAAGTCTGCATTGGCAAAAACATTGTCAAGTGCCT**  
 ZmXI-5 T2 **GTGTGAGGCCATCACGGGGATCACTAAAAAGCATACACTCTAATGCACTAGCTAGGCCAAGCATCAAGTCTGCATTGGCAAAAACATTGTCAAGTGCCT**  
 ZmXI-5 T3 **GTGTGAGGCCATCACGGGGATCACTAAAAAGCATACACTCTAATGCACTAGCTAGGCCAAGCATCAAGTCTGCATTGGCAAAAACATTGTCAAGTGCCT**

ZmXI-5 qDNA **GGATCATACACTGGAAACGATGAAAAAAAACCTATGTTGAGTCTATTCTTGATATTTTCCAGCTGCCTTACAGTTAGGGAACGCACAAGTACATTGCT**  
 ZmXI-5 T1 **GGATCATACACTGGAAACGATGAAAAAAAACCTATGTT-----**  
 ZmXI-5 T2 **GGATCATACACTGGAAACGATGAAAAAAAACCTATGTT-----**  
 ZmXI-5 T3 **GGATCATACACTGGAAACGATGAAAAAAAACCTATGTT-----**

**7645**

ZmXI-5 qDNA **GAATTTAATTTCAACCTTGTAGGTAGCTCCGGTGATAATCAGGAAAACATTTAACCAGTATTTGCATACTTGAATGTGCAACTCTTCAACAG**GTGC****  
 ZmXI-5 T1 **-----AGCTCCGGTGATAATCAGGAAAACATTTAACCAGTATTTGCATACTTGAATGTGCAACTCTTCAACAG-----**  
 ZmXI-5 T2 **-----AGCTCCGGTGATAATCAGGAAAACATTTAACCAGTATTTGCATACTTGAATGTGCAACTCTTCAACAG-----**  
 ZmXI-5 T3 **-----AGCTCCGGTGATAATCAGGAAAACATTTAACCAGTATTTGCATACTTGAATGTGCAACTCTTCAACAG**GTGC****

**Alternatively spliced intron**

ZmXI-5 qDNA **TGCTATATCCCATTCCAATTCTTAGAAAAACTTGACTGCACAGTTCATATGGGATACCAAAAAATATCCTTGGTACATGCTTTACATGGTTGATTCCG**  
 ZmXI-5 T1 **-----**  
 ZmXI-5 T2 **-----**  
 ZmXI-5 T3 **TGCTATATCCCATTCCAATTCTTAGAAAAACTTGACTGCACAGTTCATATGGGATACCAAAAAATATCCTTGGTACATGCTTTACATGGTTGATTCCG**

**7781**

**ZmXI-5-R**

**7799**

ZmXI-5 qDNA **TACTGTATCAAATTTCTACCTTTTTTTTTTTGTTAGCTTACTGCTTCGTTCGGGA**  
 ZmXI-5 T1 **-----CTTACTGCTTCGTTCGGGA**  
 ZmXI-5 T2 **-----CTTACTGCTTCGTTCGGGA**  
 ZmXI-5 T3 **TACTGTATCAAATTTCTACCTTTTTTTTTTTGTTAGCTTACTGCTTCGTTCGGGA**

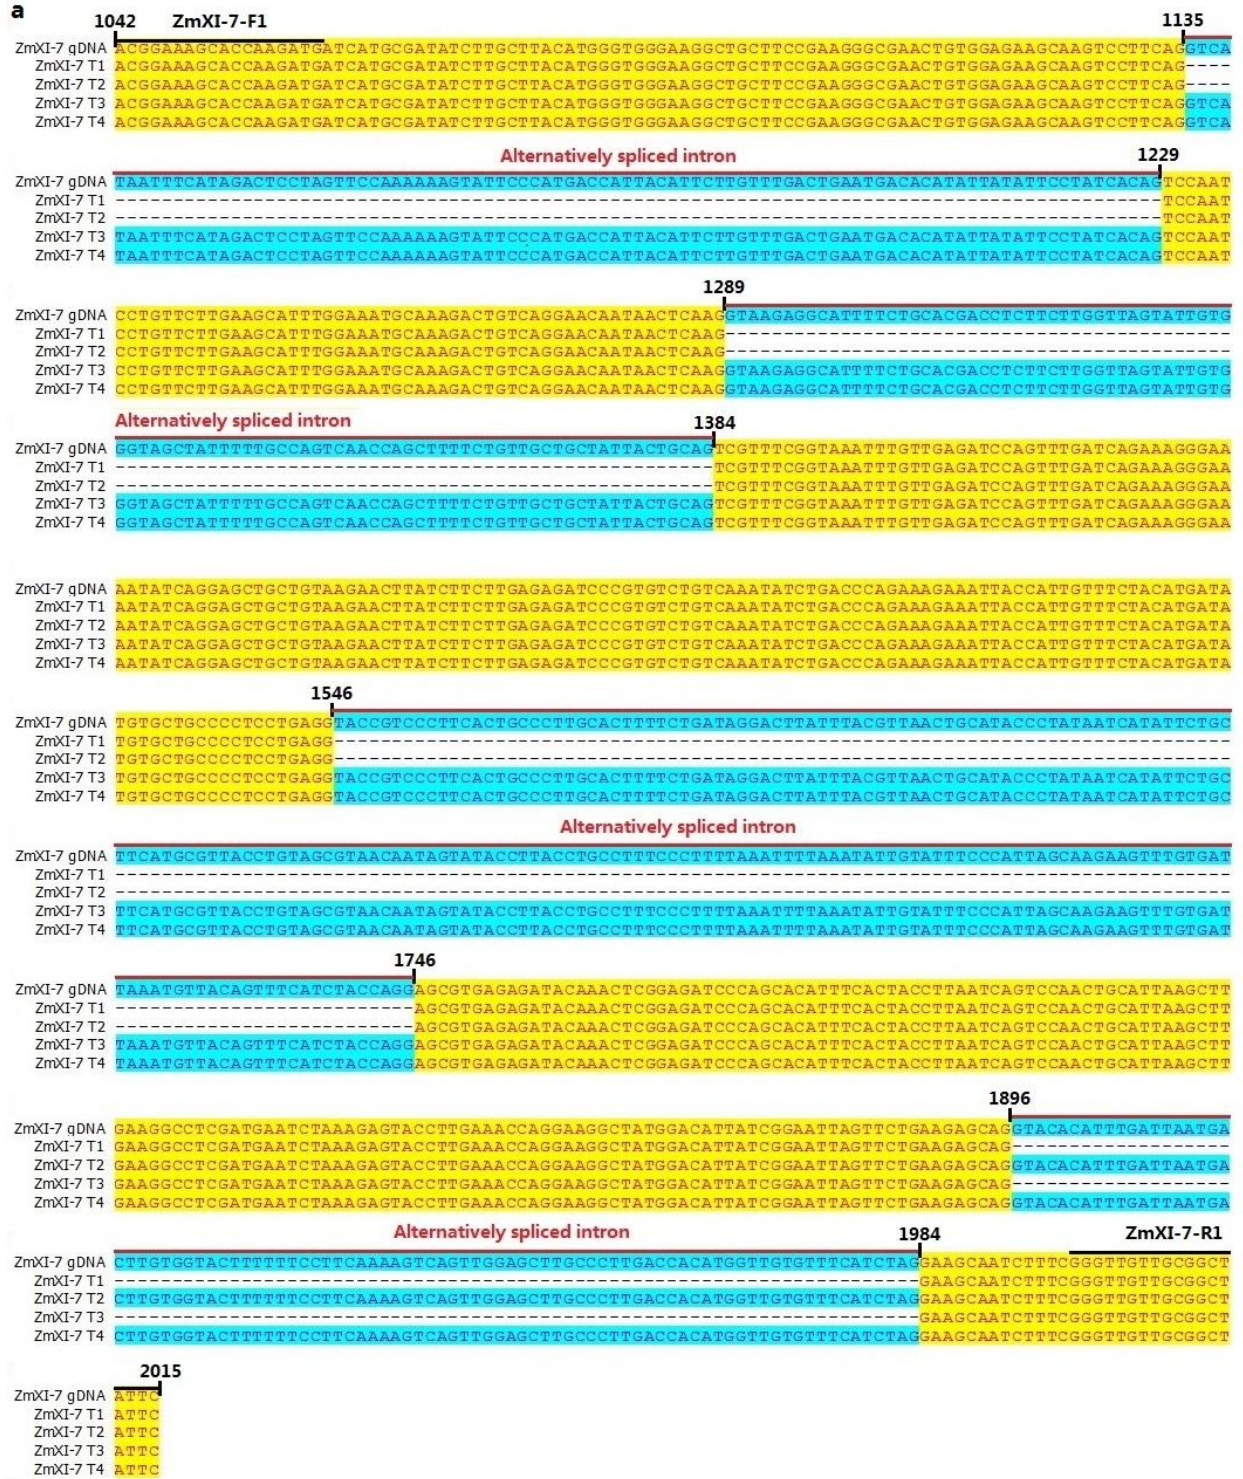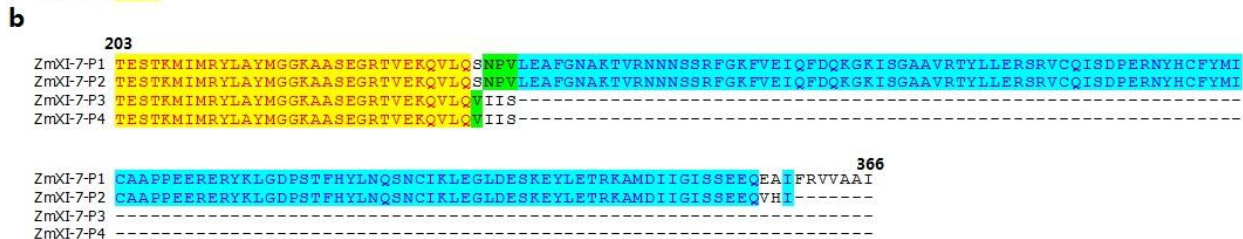



**a**

**9397**      **ZmXI-11-F**      **9416**      **Alternatively spliced intron**

ZmXI-11 qDNA **AAGTCACGACCTTTGTCCG** **STAAGGGACAAGTGT**TTATTTCTAGTTTGTCCCTCGTTCTGCTAGCATGGATCTGTGTTAACAACTCATGACTT  
ZmXI-11 T1 **AAGTCACGACCTTTGTCCG**-----  
ZmXI-11 T2 **AAGTCACGACCTTTGTCCG** **STAAGGGACAAGTGT**TTATTTCTAGTTTGTCCCTCGTTCTGCTAGCATGGATCTGTGTTAACAACTCATGACTT

**9501**      **9583**

ZmXI-11 gDNA **CCTTTTCAG**GTACTTAGTATACAACAGCTATACAGGATTAGTACTATGTACTGGGATGACAAGTATGGAACGCATAGTGTCTCCCCAGAG**GTAAAGC**  
ZmXI-11 T1 -----GTACTTAGTATACAACAGCTATACAGGATTAGTACTATGTACTGGGATGACAAGTATGGAACGCATAGTGTCTCCCCAGAG-----  
ZmXI-11 T2 **CCTTTTCAG**GTACTTAGTATACAACAGCTATACAGGATTAGTACTATGTACTGGGATGACAAGTATGGAACGCATAGTGTCTCCCCAGAG**GTAAAGC**

**Alternatively spliced intron**      **9661**

ZmXI-11 gDNA **TTCAAACGTACCGAGTTTTTTTGCATTTTCATTGCAGGTGGATAATAATTGACCATATATGATTATCATATTAG** **GTAAATCAAACATGAGAGTGT**  
ZmXI-11 T1 -----  
ZmXI-11 T2 **TTCAAACGTACCGAGTTTTTTTGCATTTTCATTGCAGGTGGATAATAATTGACCATATATGATTATCATATTAG** **GTAAATCAAACATGAGAGTGT**

**9745**

ZmXI-11 gDNA **AATGACAGAAGACTCCAACAATCCTATAAGCAATTCATTCCCTCCTGGACGATGACTCGAG** **GTTACTTTCTCTTCGCTCATATCAATCCTTTGTCT**  
ZmXI-11 T1 **AATGACAGAAGACTCCAACAATCCTATAAGCAATTCATTCCCTCCTGGACGATGACTCGAG**-----  
ZmXI-11 T2 **AATGACAGAAGACTCCAACAATCCTATAAGCAATTCATTCCCTCCTGGACGATGACTCGAG** **GTTACTTTCTCTTCGCTCATATCAATCCTTTGTCT**

**Alternatively spliced intron**      **9841**

ZmXI-11 gDNA **GCGCTACTTTCTTTTTCTTTTTGAAGTGCTTCTACTTATGCATCTGCACCTTTCTAATGCAG** **CATACCATTCCTCTGTCGATGACATATCCAAATCGA**  
ZmXI-11 T1 -----  
ZmXI-11 T2 **GCGCTACTTTCTTTTTCTTTTTGAAGTGCTTCTACTTATGCATCTGCACCTTTCTAATGCAG** **CATACCATTCCTCTGTCGATGACATATCCAAATCGA**

ZmXI-11 qDNA **TGCAGCAGATTGACATATCTGACATCGAGCCACCTCCATTGATCCGAGAGAACTCTGGCTTTGTATTCTTGTGCGGCCACCTGAATAGATGTGTG**  
ZmXI-11 T1 **TGCAGCAGATTGACATATCTGACATCGAGCCACCTCCATTGATCCGAGAGAACTCTGGCTTTGTATTCTTGTGCGGCCACCTGAATAGATGTGTG**  
ZmXI-11 T2 **TGCAGCAGATTGACATATCTGACATCGAGCCACCTCCATTGATCCGAGAGAACTCTGGCTTTGTATTCTTGTGCGGCCACCTGAATAGATGTGTG**

**ZmXI-11-R**      **10033**

ZmXI-11 gDNA **GCATGATGGTCAATTTTGTCAATGATTGCAAGAACCCTAAGAATGGTTATTGGGCGACAATC**  
ZmXI-11 T1 **GCATGATGGTCAATTTTGTCAATGATTGCAAGAACCCTAAGAATGGTTATTGGGCGACAATC**  
ZmXI-11 T2 **GCATGATGGTCAATTTTGTCAATGATTGCAAGAACCCTAAGAATGGTTATTGGGCGACAATC**

**b**

**1429**

ZmXI-11-P1 **SHDLCPV**LSIQQLYRISTMYWDDKYGTHSVSPEVISNMRVLMTEDSNPNISNSFLDDDDSSIPFSVDDISKSMQIDISDIEPPPLIRENSGFVFLLP  
ZmXI-11-P2 **SHDLCPV**RDKCLFSSFVPRASIGSC\*-----

**1529**

ZmXI-11-P1 **PPE\***  
ZmXI-11-P2 -----



**Supplementary Figure S2.** Transcript evidence and splicing event for maize myosin genes.

**ZmVIII-1**

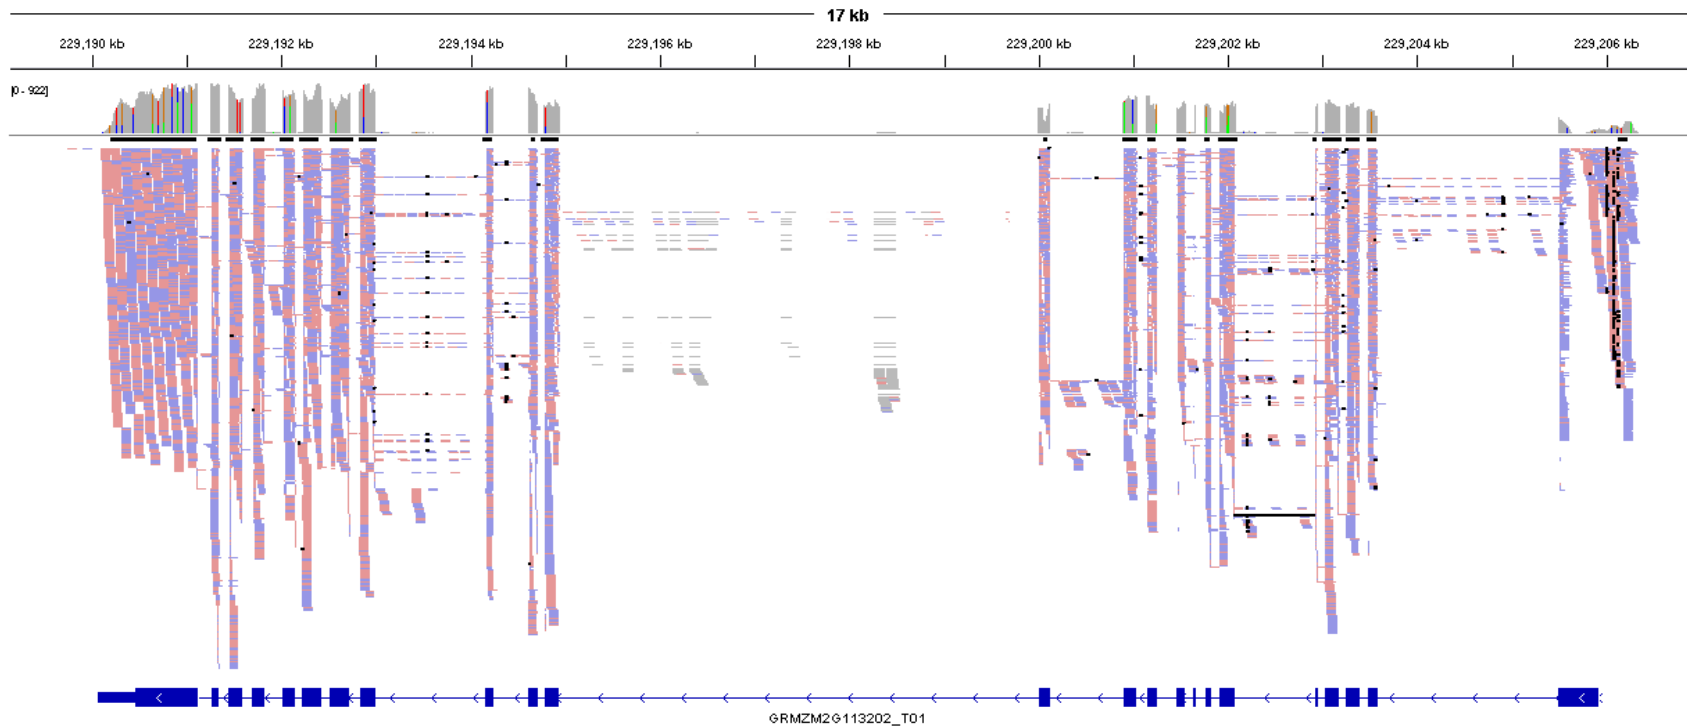

# ZmVIII-2

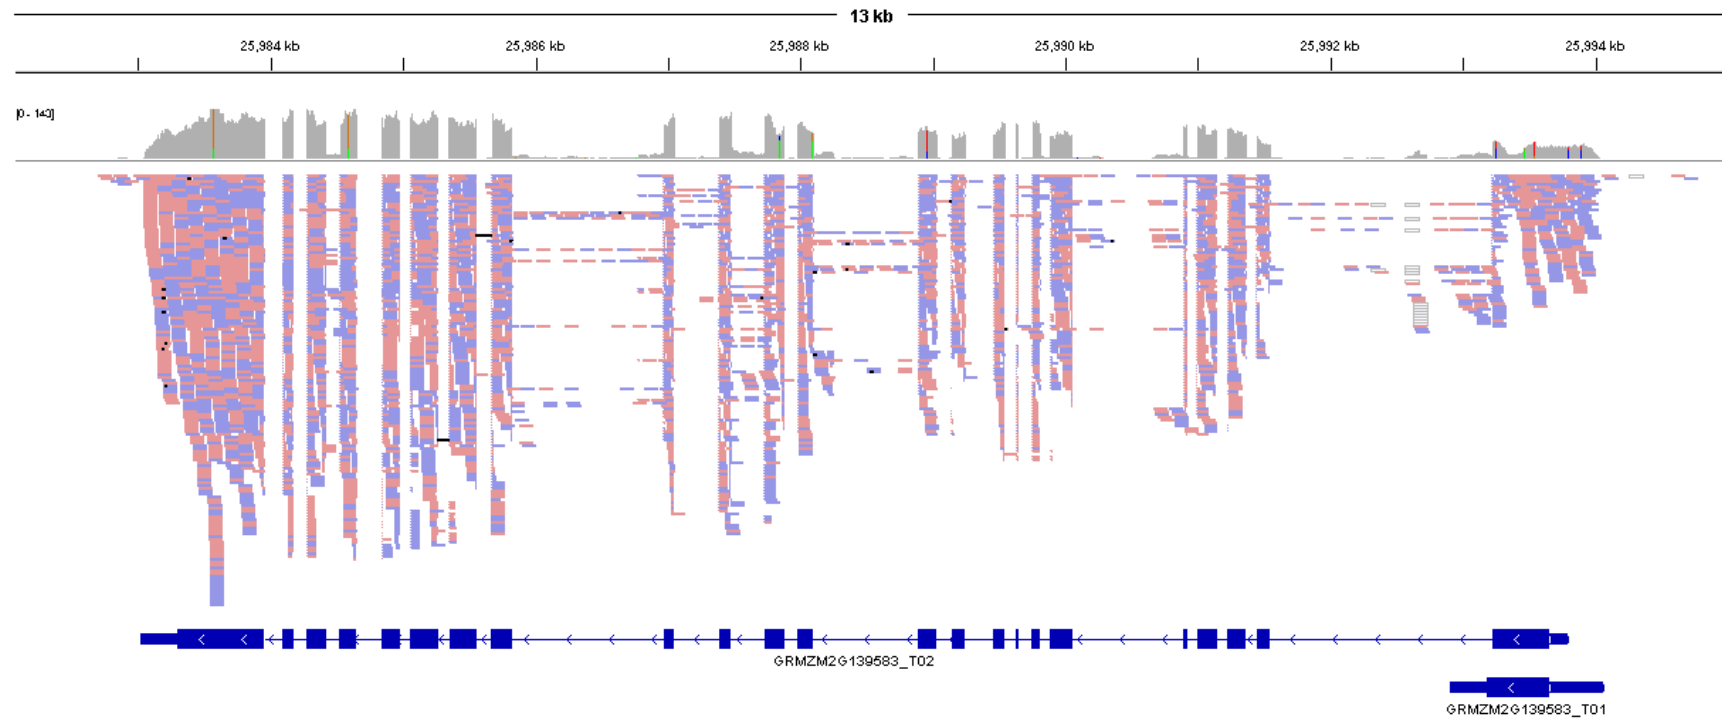

# ZmVIII-3

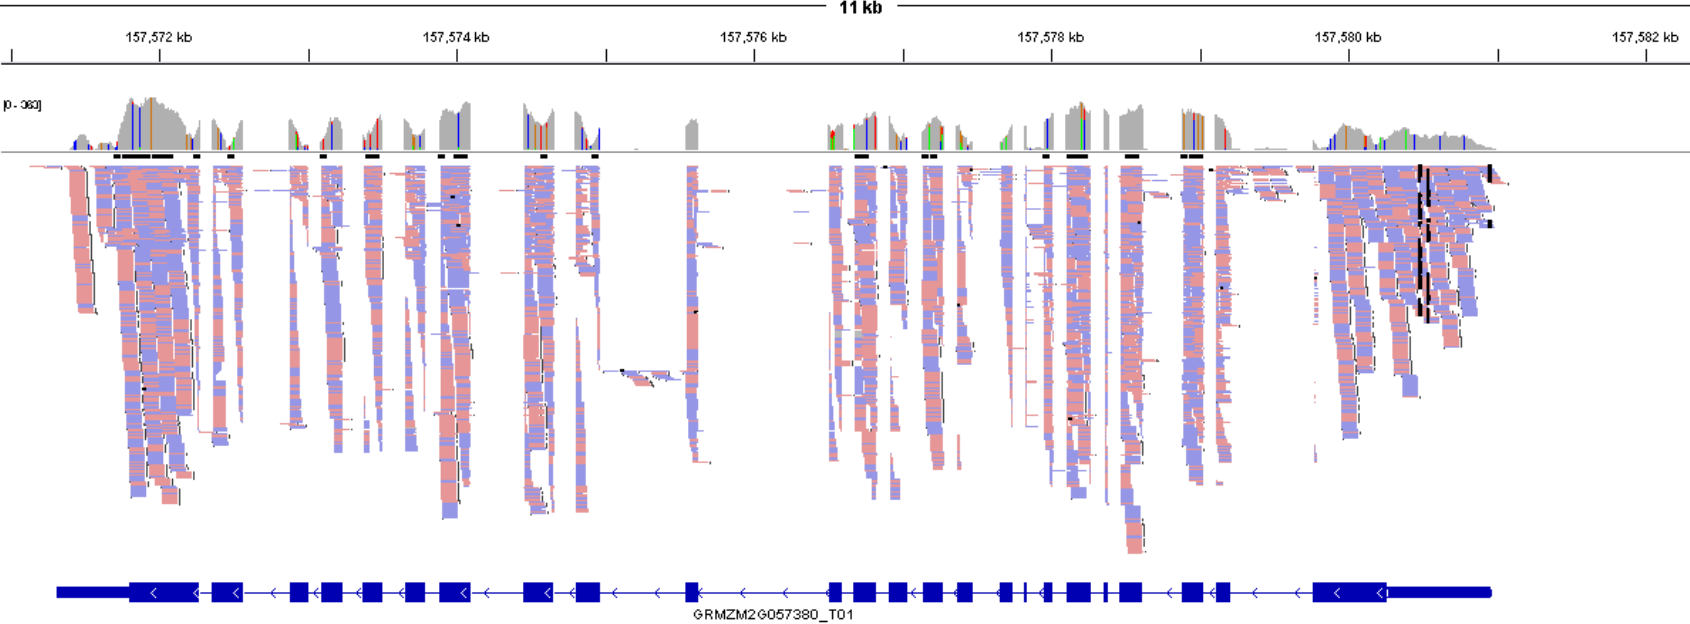

# ZmXI-1

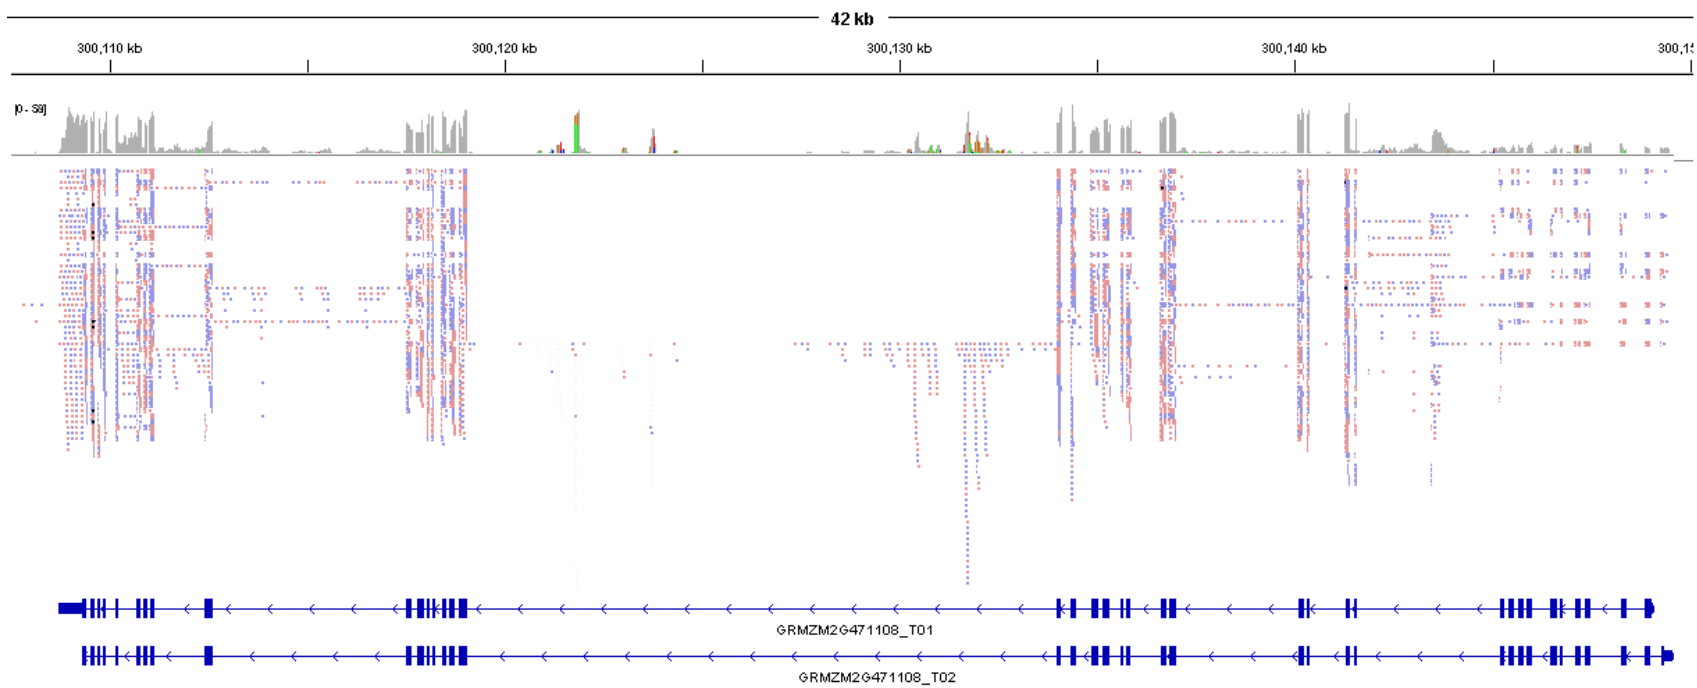

# ZmXI-3

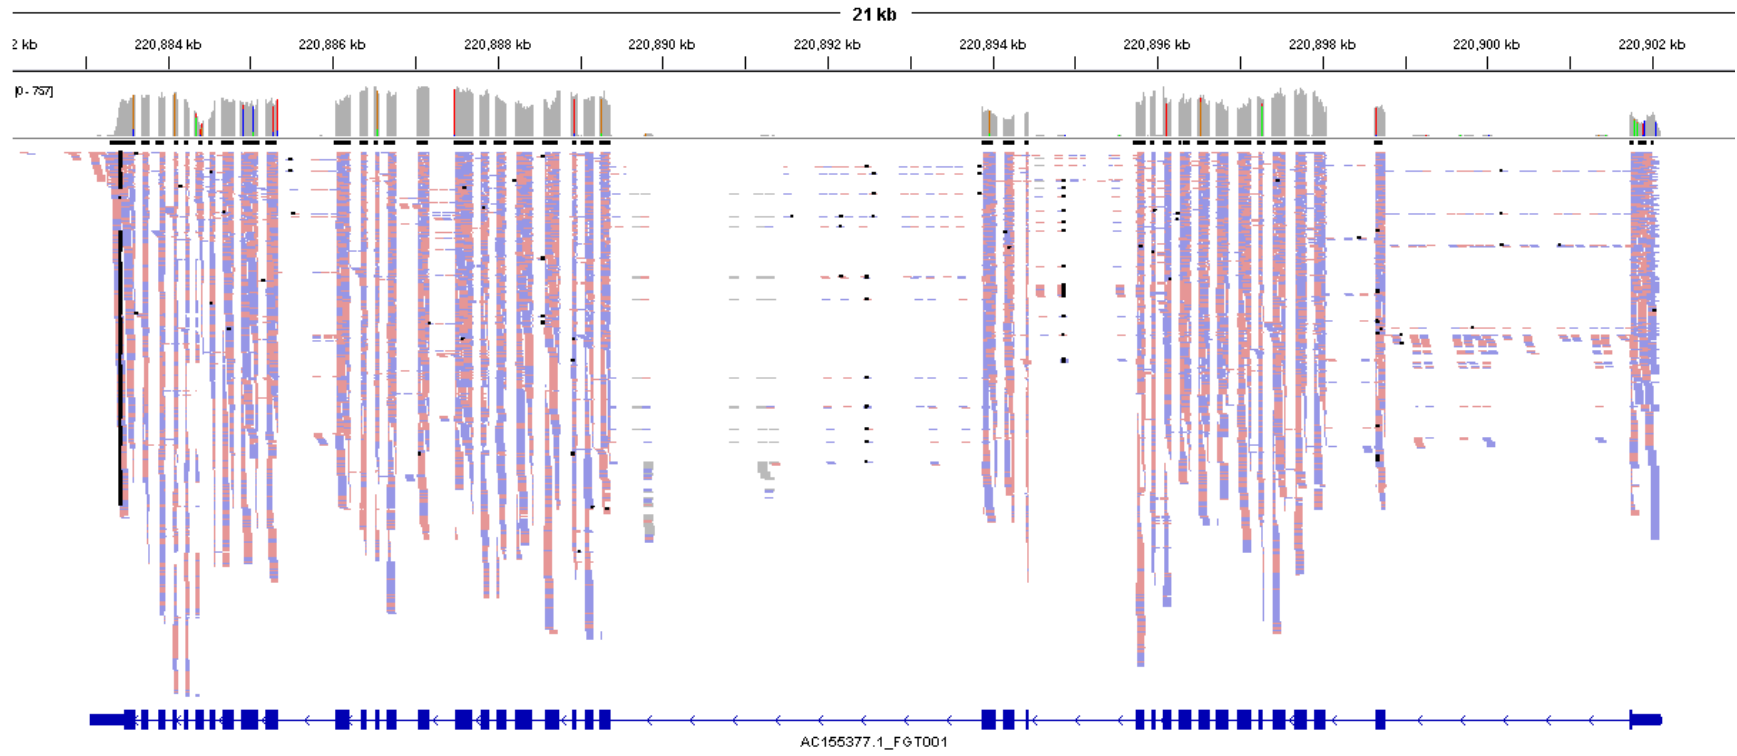

# ZmXI-4

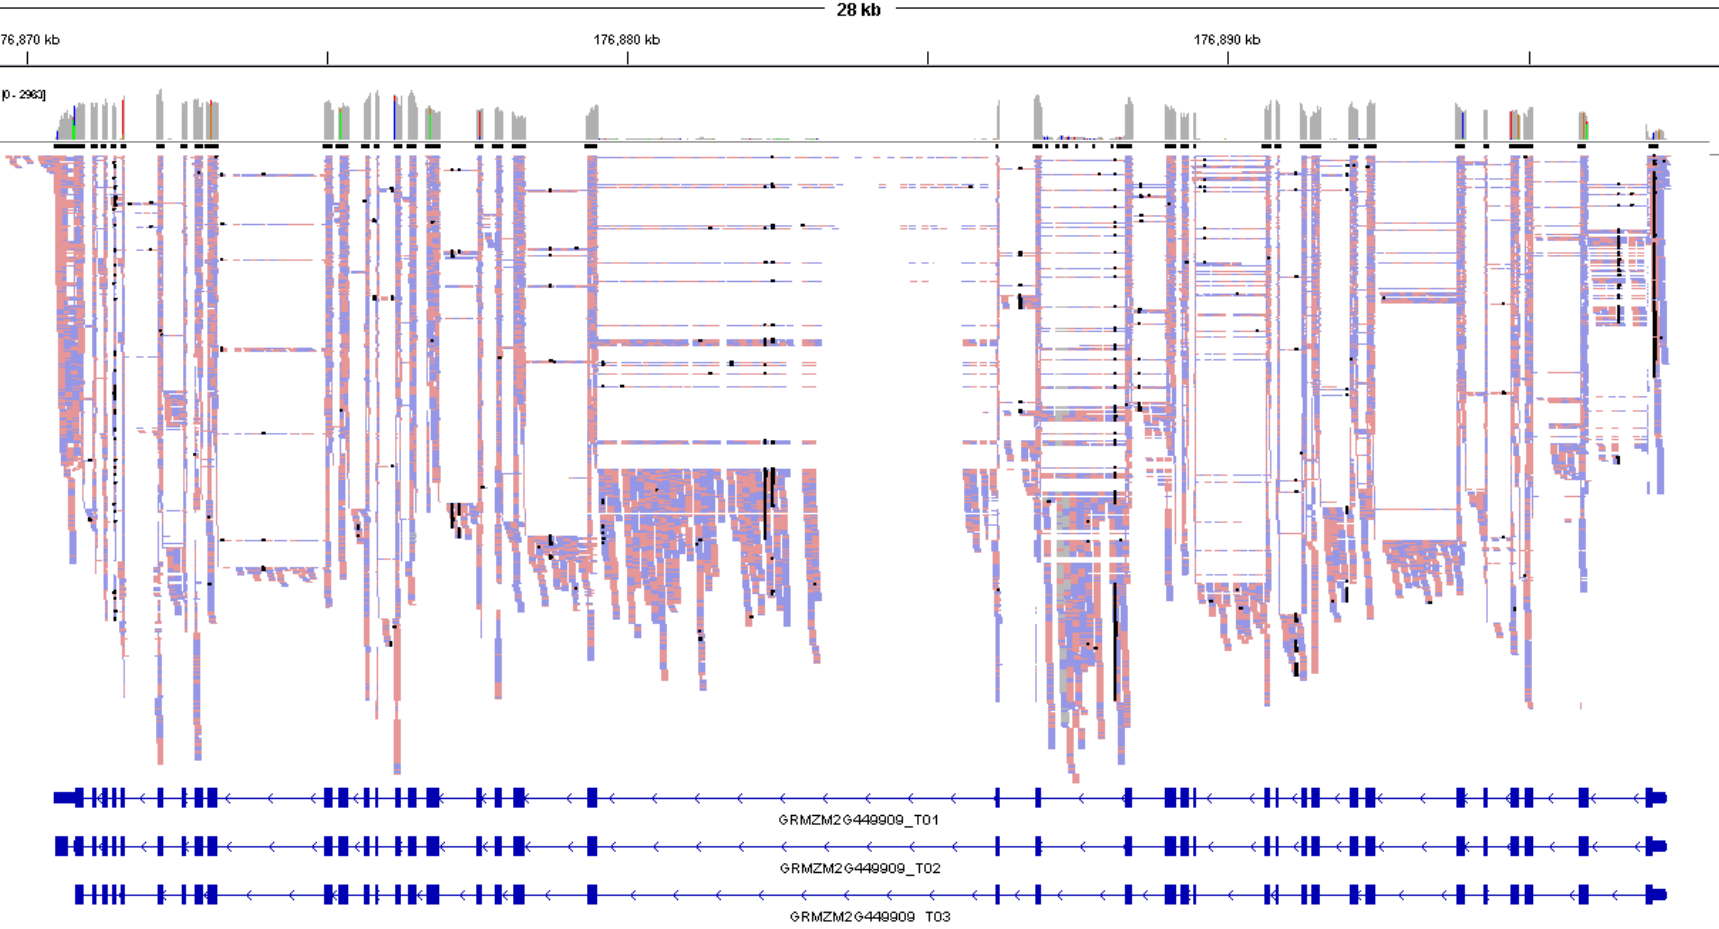

# ZmXI-5

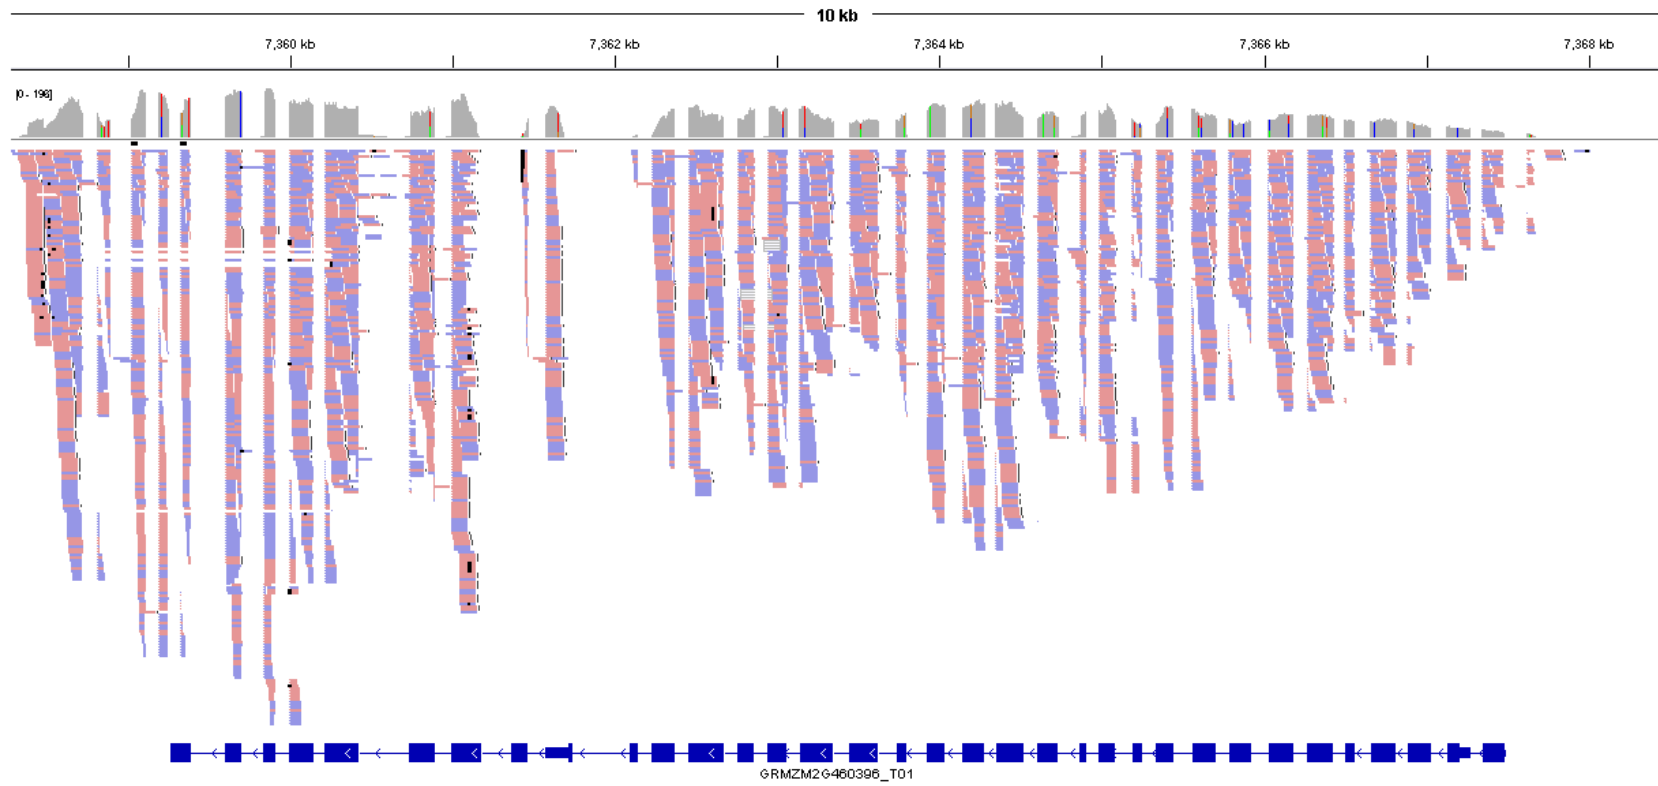

ZmXI-6

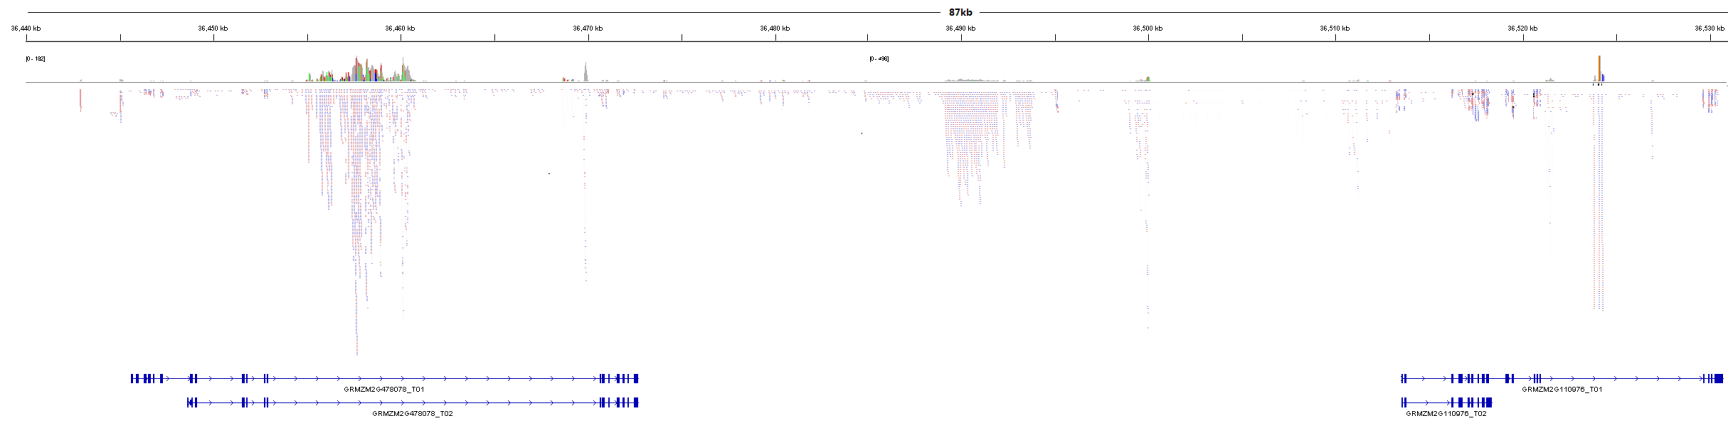



# ZmXI-7

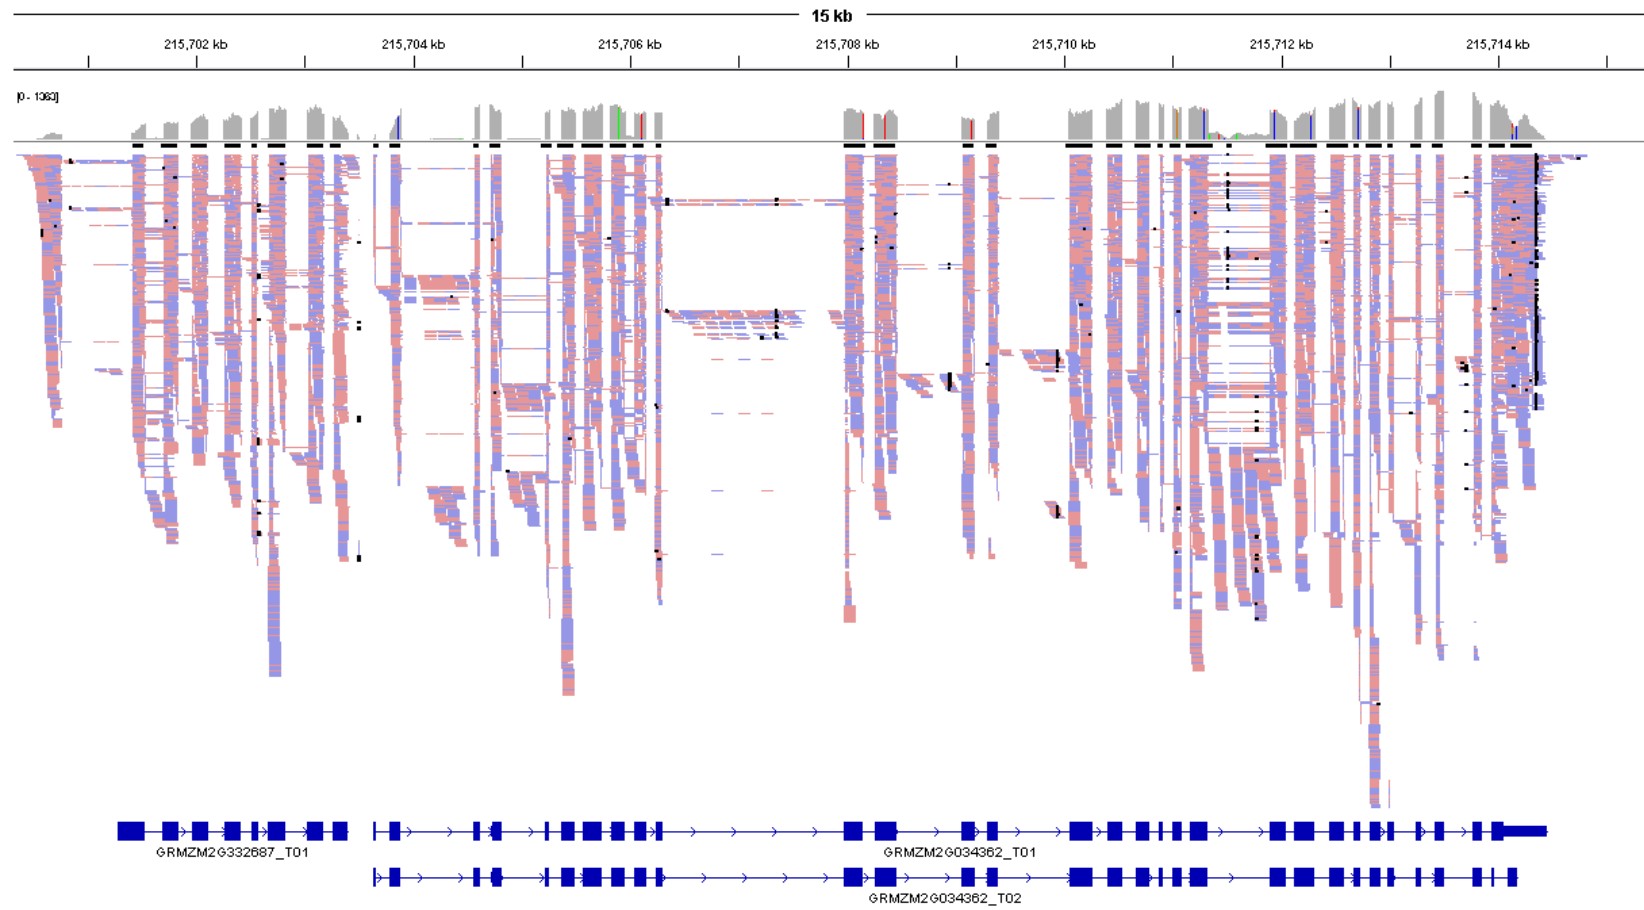

### ZmXI-8

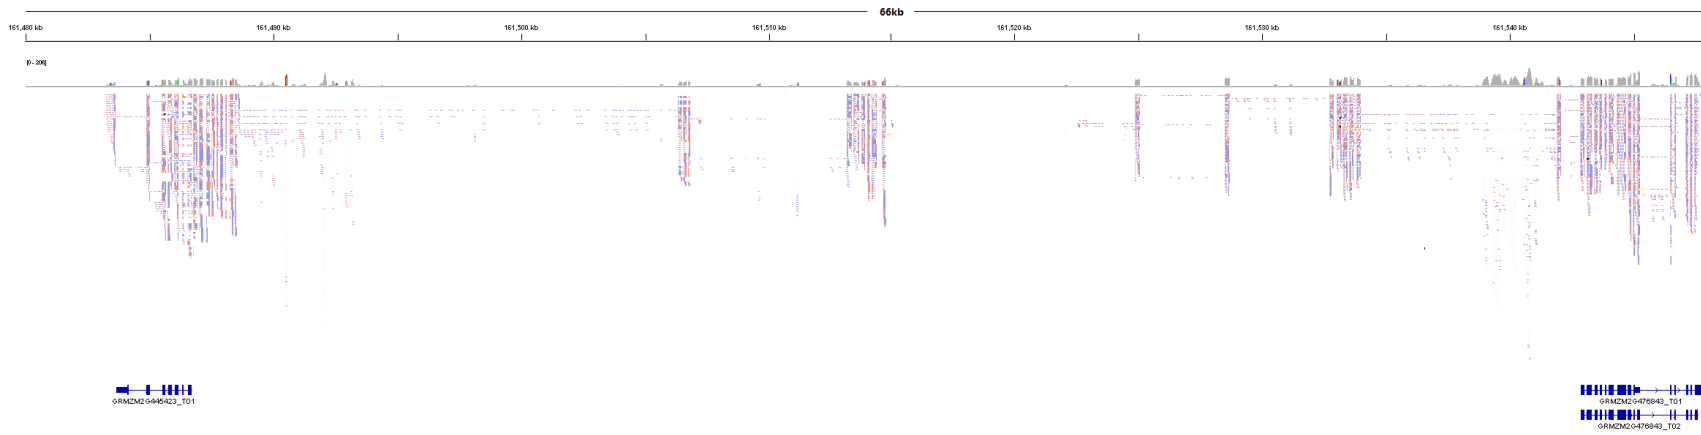

### ZmXI-9

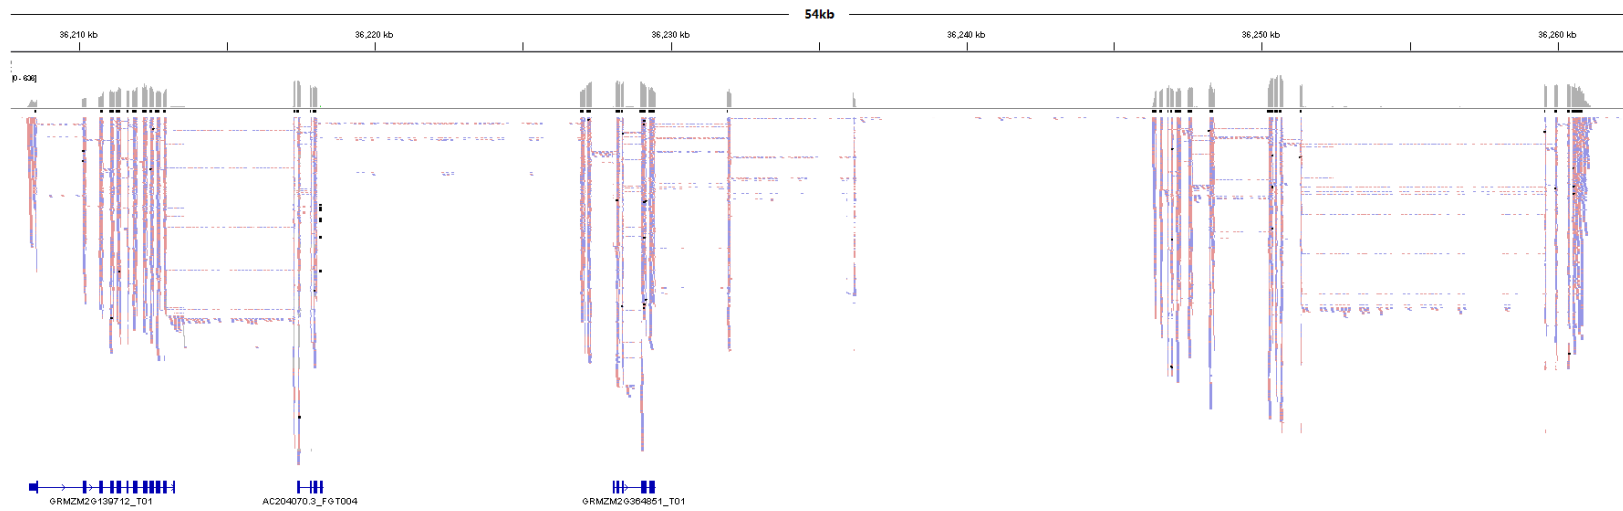

# ZmXI-10

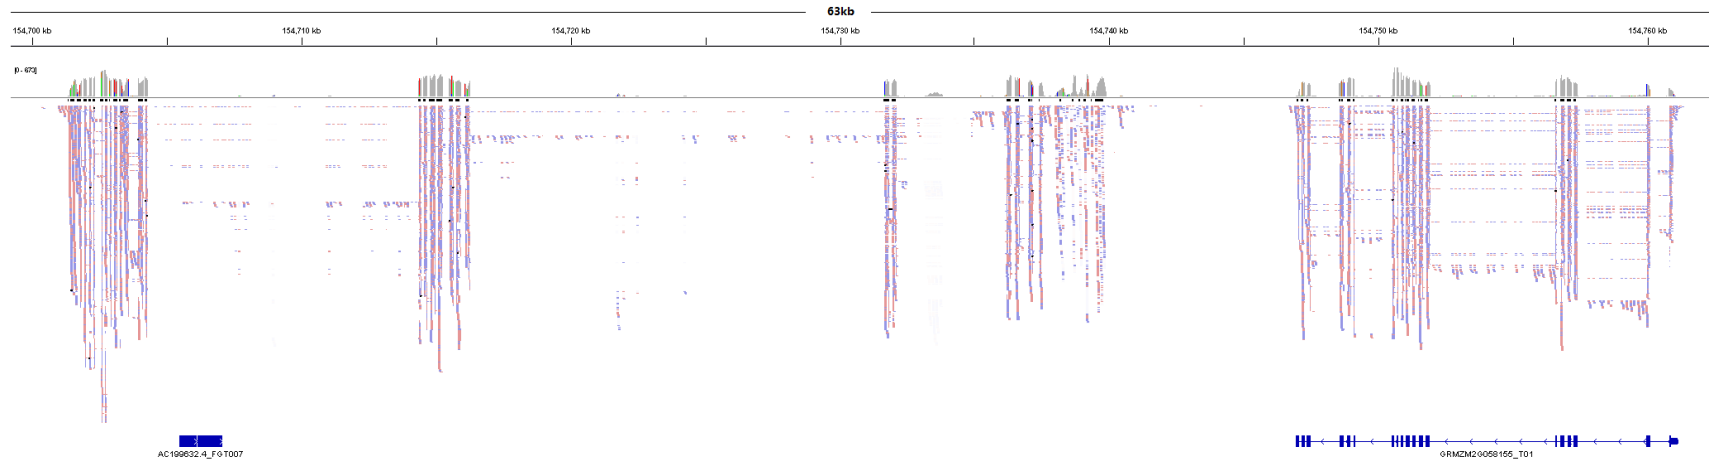

**Supplementary Figure S3.** The determination of the headless derivative of *O1* using two independent 5' RACE experiments.

|              |       |                                                                                            |     |                              |     |     |     |     |     |           |     |
|--------------|-------|--------------------------------------------------------------------------------------------|-----|------------------------------|-----|-----|-----|-----|-----|-----------|-----|
|              | (1)   | 1                                                                                          | 10  | <b>5' RACE1 Inner Primer</b> | 30  | 40  | 50  | 60  | 70  | 88        |     |
| HDO1-5RACE-1 | (1)   | CGCGGATCCGAACACTGCGTTTTGCTGGCTTTGATGAAATTTCCAGAATTACCGGCAAGCCACTGTGGCAATTCAGTGTTCTTGGAGAC  |     |                              |     |     |     |     |     |           |     |
| HDO1-5RACE-2 | (1)   | CGCGGATCCGAACACTGCGTTTTGCTGGCTTTGATGAAATTTCCAGAATTACCGGCAAGCCACTGTGGCAATTCAGTGTTCTTGGAGAC  |     |                              |     |     |     |     |     |           |     |
| Consensus    | (1)   | CGCGGATCCGAACACTGCGTTTTGCTGGCTTTGATGAAATTTCCAGAATTACCGGCAAGCCACTGTGGCAATTCAGTGTTCTTGGAGAC  |     |                              |     |     |     |     |     |           |     |
|              |       |                                                                                            |     |                              |     |     |     |     |     | Section 2 |     |
|              | (89)  | 89                                                                                         | 100 | 110                          | 120 | 130 | 140 | 150 | 160 | 176       |     |
| HDO1-5RACE-1 | (89)  | AGAAGCTTGCAAGAAAGGAGCTAAGGAAACTCAAAATGGCTGCAAATGAAGCTGGTGCCTGCGTGAGGCCAAAGAATAAGCTTGAGAA   |     |                              |     |     |     |     |     |           |     |
| HDO1-5RACE-2 | (89)  | AGAAGCTTGCAAGAAAGGAGCTAAGGAAACTCAAAATGGCTGCAAATGAAGCTGGTGCCTGCGTGAGGCCAAAGAATAAGCTTGAGAA   |     |                              |     |     |     |     |     |           |     |
| Consensus    | (89)  | AGAAGCTTGCAAGAAAGGAGCTAAGGAAACTCAAAATGGCTGCAAATGAAGCTGGTGCCTGCGTGAGGCCAAAGAATAAGCTTGAGAA   |     |                              |     |     |     |     |     |           |     |
|              |       |                                                                                            |     |                              |     |     |     |     |     | Section 3 |     |
|              | (177) | 177                                                                                        | 190 | 200                          | 210 | 220 | 230 | 240 | 250 | 264       |     |
| HDO1-5RACE-1 | (177) | AAAGATGGATGATCTTGCTTTAAGACTTACCCTTGAAAGGAGACTGCGGGCTTCCAGTGAAGAGTCAAAATCAGTAGAAATATTGAAG   |     |                              |     |     |     |     |     |           |     |
| HDO1-5RACE-2 | (177) | AAAGATGGATGATCTTGCTTTAAGACTTACCCTTGAAAGGAGACTGCGGGCTTCCAGTGAAGAGTCAAAATCAGTAGAAATATTGAAG   |     |                              |     |     |     |     |     |           |     |
| Consensus    | (177) | AAAGATGGATGATCTTGCTTTAAGACTTACCCTTGAAAGGAGACTGCGGGCTTCCAGTGAAGAGTCAAAATCAGTAGAAATATTGAAG   |     |                              |     |     |     |     |     |           |     |
|              |       |                                                                                            |     |                              |     |     |     |     |     | Section 4 |     |
|              | (265) | 265                                                                                        | 270 | 280                          | 290 | 300 | 310 | 320 | 330 | 340       | 352 |
| HDO1-5RACE-1 | (265) | CGTGACAAAATAATTGAATCATTAAGTGCAGAATGTGCTGCCGCTAAGTCAGCTGCTCAAAATGAACATGCCAAAAAATTGCTGCTCC   |     |                              |     |     |     |     |     |           |     |
| HDO1-5RACE-2 | (265) | CGTGACAAAATAATTGAATCATTAAGTGCAGAATGTGCTGCCGCTAAGTCAGCTGCTCAAAATGAACATGCCAAAAAATTGCTGCTCC   |     |                              |     |     |     |     |     |           |     |
| Consensus    | (265) | CGTGACAAAATAATTGAATCATTAAGTGCAGAATGTGCTGCCGCTAAGTCAGCTGCTCAAAATGAACATGCCAAAAAATTGCTGCTCC   |     |                              |     |     |     |     |     |           |     |
|              |       |                                                                                            |     |                              |     |     |     |     |     | Section 5 |     |
|              | (353) | 353                                                                                        | 360 | 370                          | 380 | 390 | 400 | 410 | 420 | 430       | 440 |
| HDO1-5RACE-1 | (353) | AAAAGCAGTTGGATGATTCTTTGAGAGAGATTACTATGTTGCAGAGTAAAAAGATTATGTTCAGCAGAAGCAGCAGAAGAAAAC TCCAA |     |                              |     |     |     |     |     |           |     |
| HDO1-5RACE-2 | (353) | AAAAGCAGTTGGATGATTCTTTGAGAGAGATTACTATGTTGCAGAGTAAAAAGATTATGTTCAGCAGAAGCAGCAGAAGAAAAC TCCAA |     |                              |     |     |     |     |     |           |     |
| Consensus    | (353) | AAAAGCAGTTGGATGATTCTTTGAGAGAGATTACTATGTTGCAGAGTAAAAAGATTATGTTCAGCAGAAGCAGCAGAAGAAAAC TCCAA |     |                              |     |     |     |     |     |           |     |
|              |       |                                                                                            |     |                              |     |     |     |     |     | Section 6 |     |
|              | (441) | 441                                                                                        | 450 | 460                          | 470 | 480 | 490 | 500 | 510 | 528       |     |
| HDO1-5RACE-1 | (441) | CCTAAAGAACTTAGTTGAATCATTATCTACGAAGAACTCAATACTGGAGAATGAACTTATTGTGACTCGCAAAAGTAGTGATGA       |     |                              |     |     |     |     |     |           |     |
| HDO1-5RACE-2 | (441) | CCTAAAGAACTTAGTTGAATCATTATCTACGAAGAACTCAATACTGGAGAATGAACTTATTGTGACTCGCAAAAGTAGTGATGA       |     |                              |     |     |     |     |     |           |     |
| Consensus    | (441) | CCTAAAGAACTTAGTTGAATCATTATCTACGAAGAACTCAATACTGGAGAATGAACTTATTGTGACTCGCAAAAGTAGTGATGA       |     |                              |     |     |     |     |     |           |     |
|              |       |                                                                                            |     |                              |     |     |     |     |     | Section 7 |     |
|              | (529) | 529                                                                                        | 540 | 550                          | 561 |     |     |     |     |           |     |
| HDO1-5RACE-1 | (529) | -----HDO1-5RACE2-Primer-----                                                               |     |                              |     |     |     |     |     |           |     |
| HDO1-5RACE-2 | (529) | ATGGAAAAATTGAAGGAAGTCGAGGGGAAATGC                                                          |     |                              |     |     |     |     |     |           |     |
| Consensus    | (529) | ATGGAAAAATTGAAGGAAGTCGAGGGGAAATGC                                                          |     |                              |     |     |     |     |     |           |     |
